# Supplementary material for: Facile grinding method synthesis of SnS2@HKUST-1 and SnS2@Ni-MOF for electrocatalytic hydrogen evolution
Source: Royal Society of Chemistry journal article supplement (doi:10.1039/d3nj05571j), 2024-01-01
Supplement: d3nj05571j1.pdf [file d3nj05571j1.pdf]

# Facile grinding method synthesis of SnS<sub>2</sub>@HKUST-1 and SnS<sub>2</sub>@Ni-MOF for Electrocatalytic Hydrogen Evolution

Hongtao Cui, Lige Gong, Hongyan Lv, Limin Dong,\* Jihua Wang, Jingyu Zhang, Yitong Mu,  
Yunhao Gu, Hui Li, Binghe Yang, Meijia Wang  
*School of Materials Science and Chemical Engineering, Harbin University of Science and Technology, Harbin 150080,  
China, E-mail: donglm@hrbust.edu.cn*

## 1.1 Synthesis of different SnS<sub>2</sub>

**Synthesis of different S1:** Sulfoarea (0.304 g, 4 mmol) was dissolved in 40 mL distilled water and added with stirring to SnCl<sub>4</sub> (1.042 g, 4 mmol) for 30min. Then, this solution was sealed in a 100mL Teflon-lined steel autoclave, heated at 180°C for 12h and then cooled to room temperature. The yellow powder(S1) was separated by filtration, washed with distilled water and dried in air.

**Synthesis of different S2:**The synthetic procedure of S2 was identical to S1, except using Thioacetamide (TAA, 0.305 g, 4 mmol) instead of Sulfoarea.

**Synthesis of different S3:**The synthetic procedure of S3 was identical to S1, except and the pH value was adjusted to 8.5 by 1 M NaOH.

**Synthesis of different S4:**The synthetic procedure of S4 was identical to S3, except using Thioacetamide (TAA, 0.305 g, 4 mmol) instead of Sulfoarea.

**Synthesis of different S5:**The synthetic procedure of S5 was identical to S1, except using C<sub>8</sub>H<sub>12</sub>O<sub>8</sub>Sn (Tin(IV) acetate, 0.174 g, 4 mmol) instead of SnCl<sub>4</sub>.

**Synthesis of different S6:**The synthetic procedure of S6 was identical to S5, except using Thioacetamide (TAA, 0.305 g, 4 mmol) instead of Sulfoarea.

**Synthesis of different S7:**The synthetic procedure of S7 was identical to S5, except and the pH value was adjusted to 8.5 by 1 M NaOH.

**The formula for calculating R<sub>ct</sub>:**

$$Z = R_e + \frac{1}{j\omega C_d + \frac{1}{R_{ct} + \sigma\omega^{-1/2}(1-f)}} \quad (1)$$

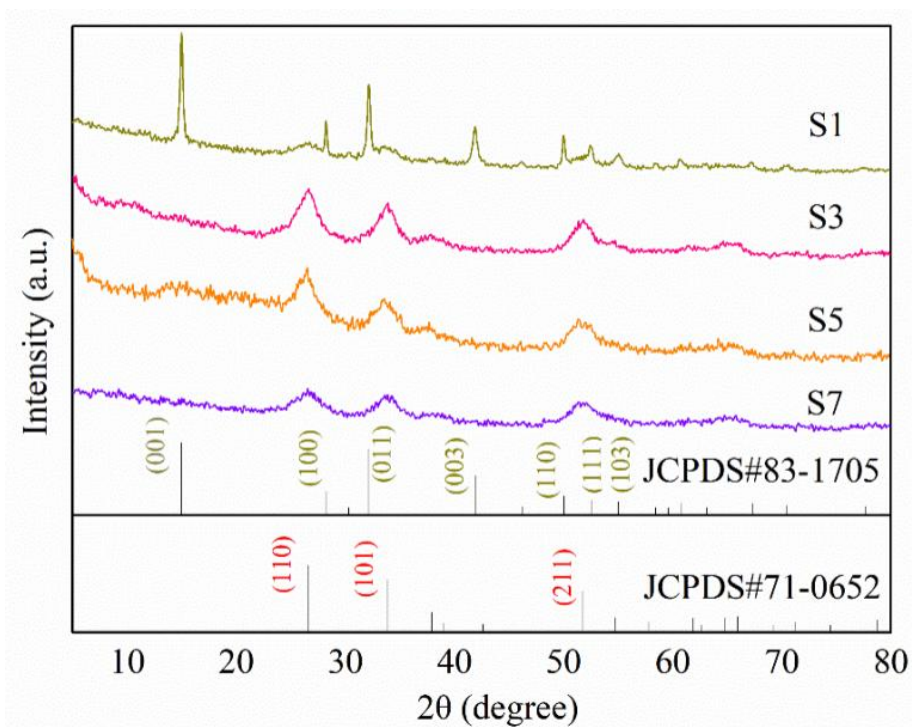

Figure SI1 The XRD patterns of the S1, S3, S5, and S7 samples.

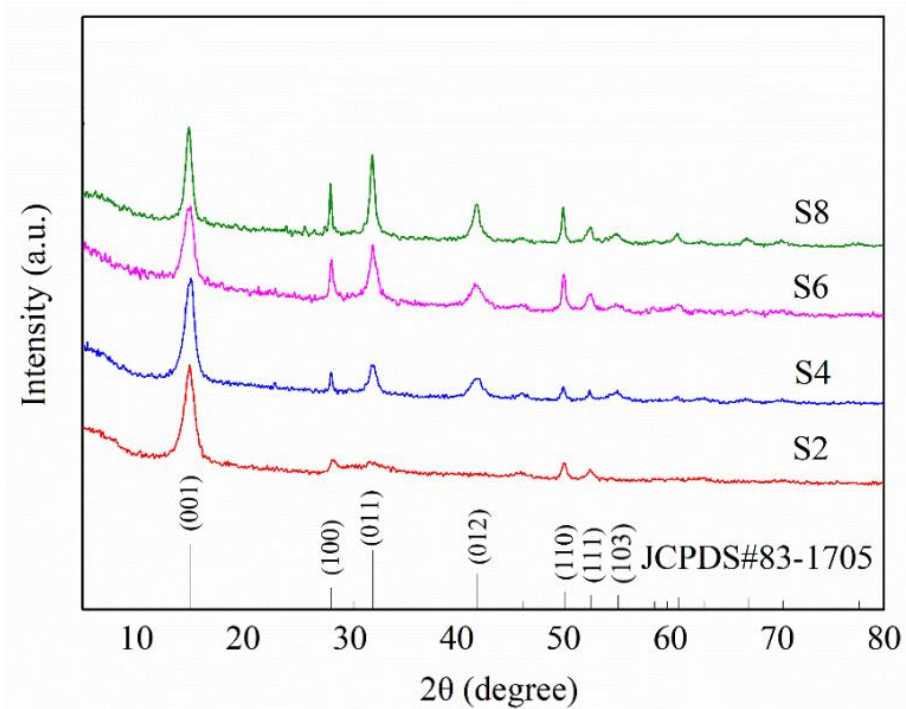

Figure SI2 The XRD patterns of the S2, S4, S6 and S8 samples.

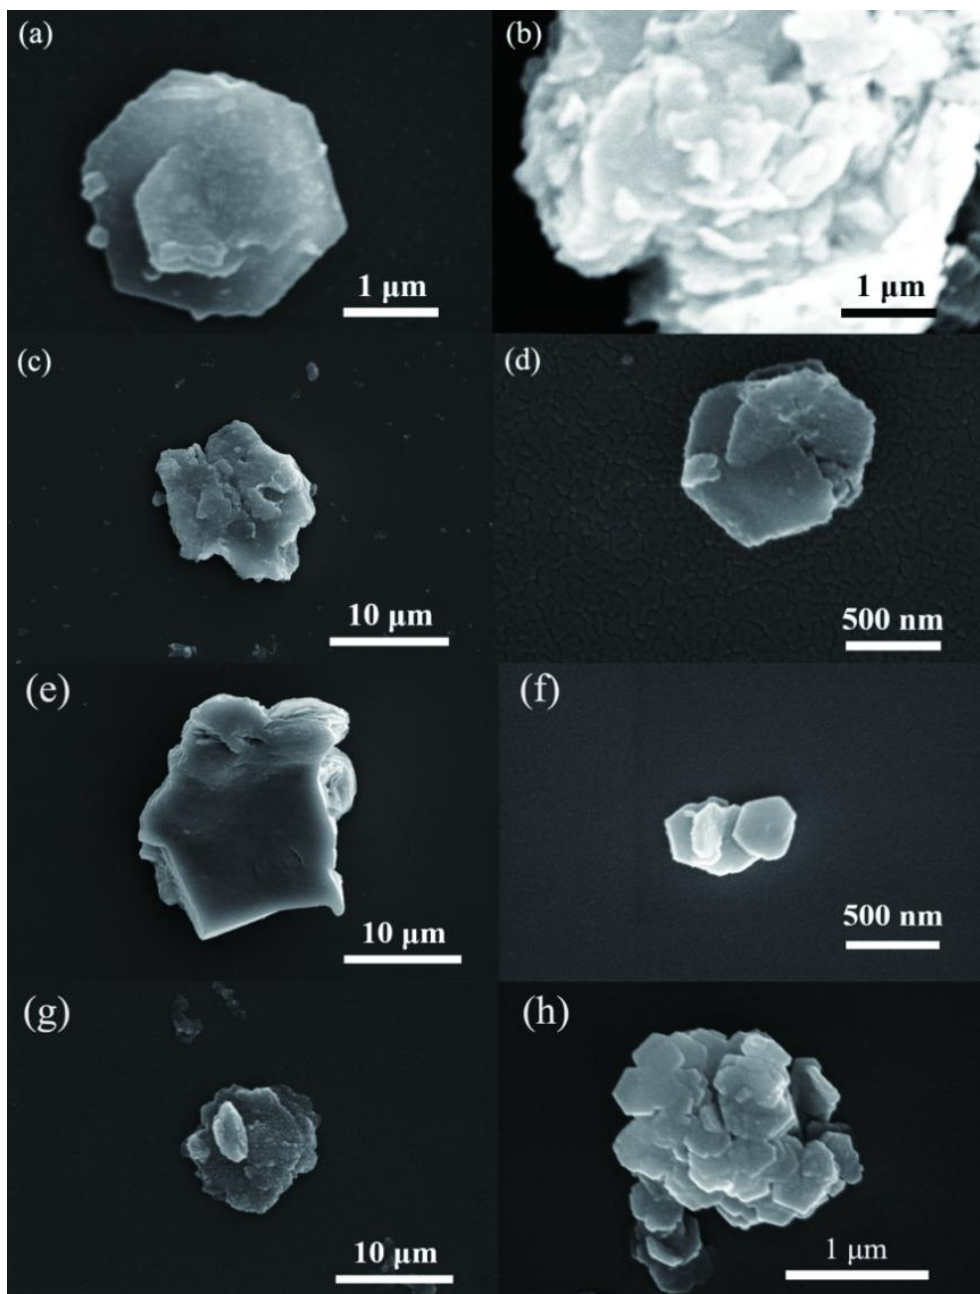

Figure SI3 (a) SEM diagram of **S1**,(b) SEM diagram of **S2**,(c) SEM diagram of **S3**,(d) SEM diagram of **S4**,(e) SEM diagram of **S5**,(f) SEM diagram of **S6**,(g) SEM diagram of **S7**,(h) SEM diagram of **S8**.

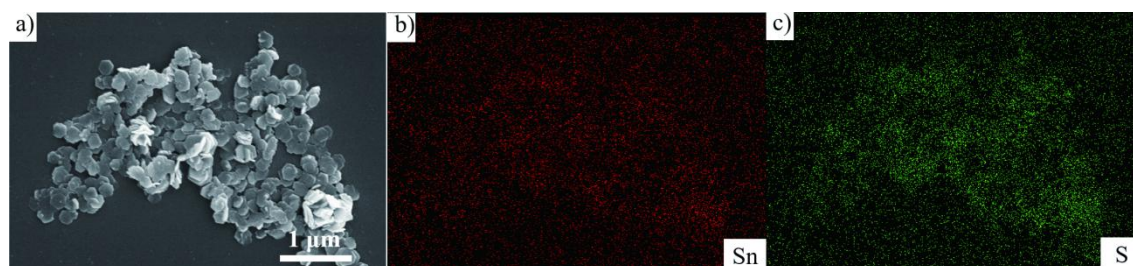

Figure SI4 the EDS of **S8**.



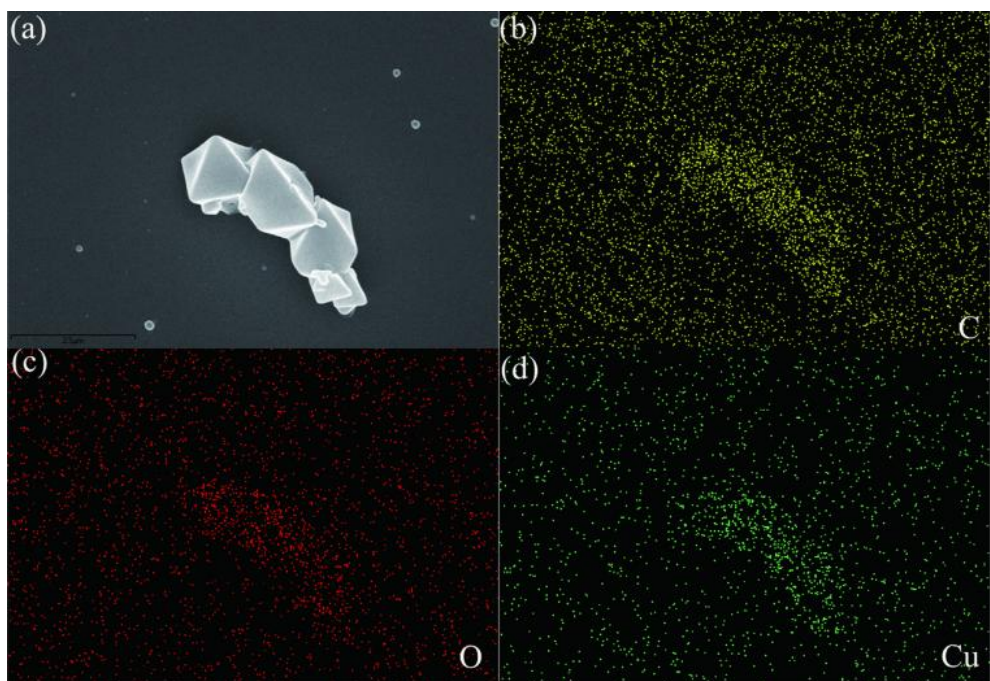

Figure SI5 the EDS of HKUST-1.

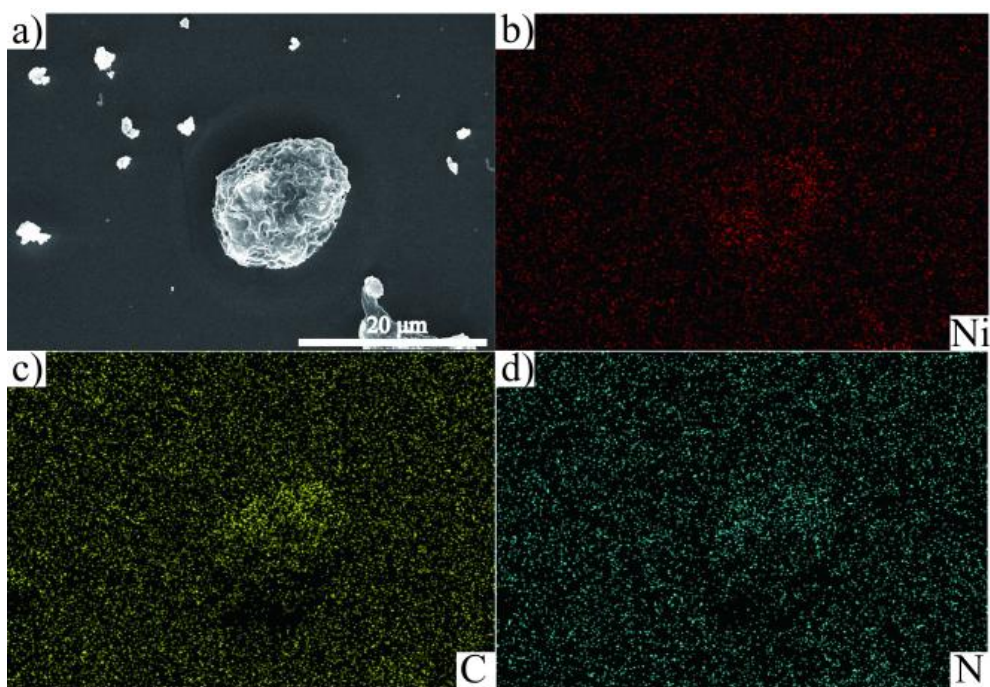

Figure SI6 the EDS of Ni-MOF.

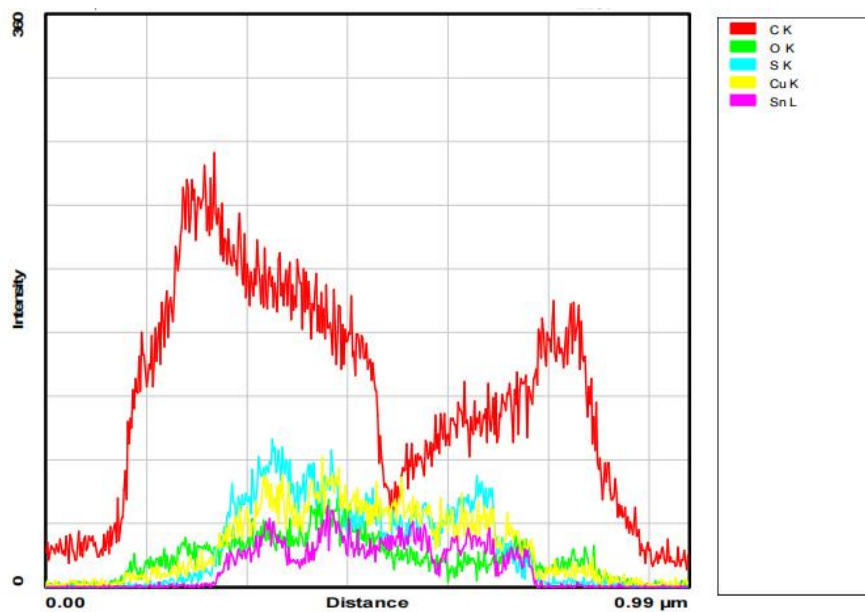

Figure SI7 The EDS line scanning profile of SnSn<sub>2</sub>@HKUST-1.

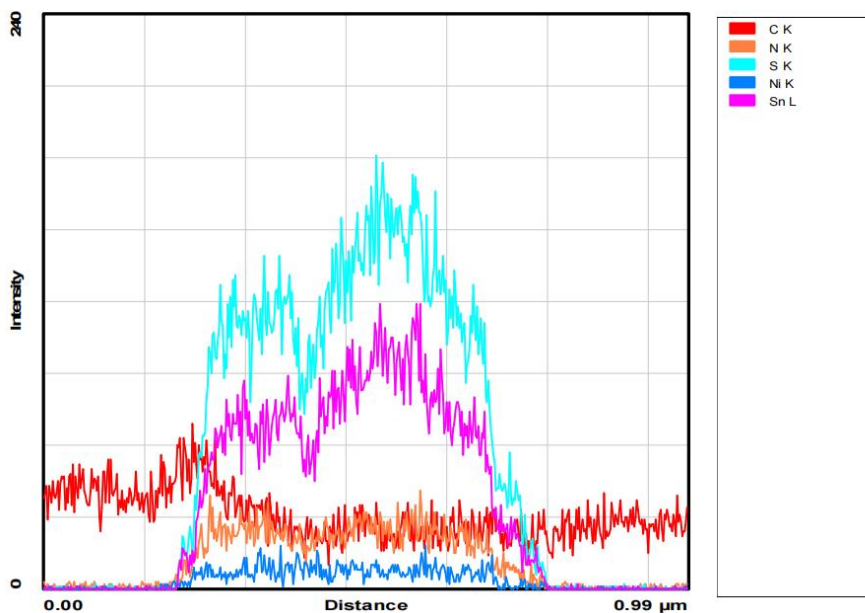

Figure SI8 The EDS line scanning profile of SnSn<sub>2</sub>@Ni-MOF.

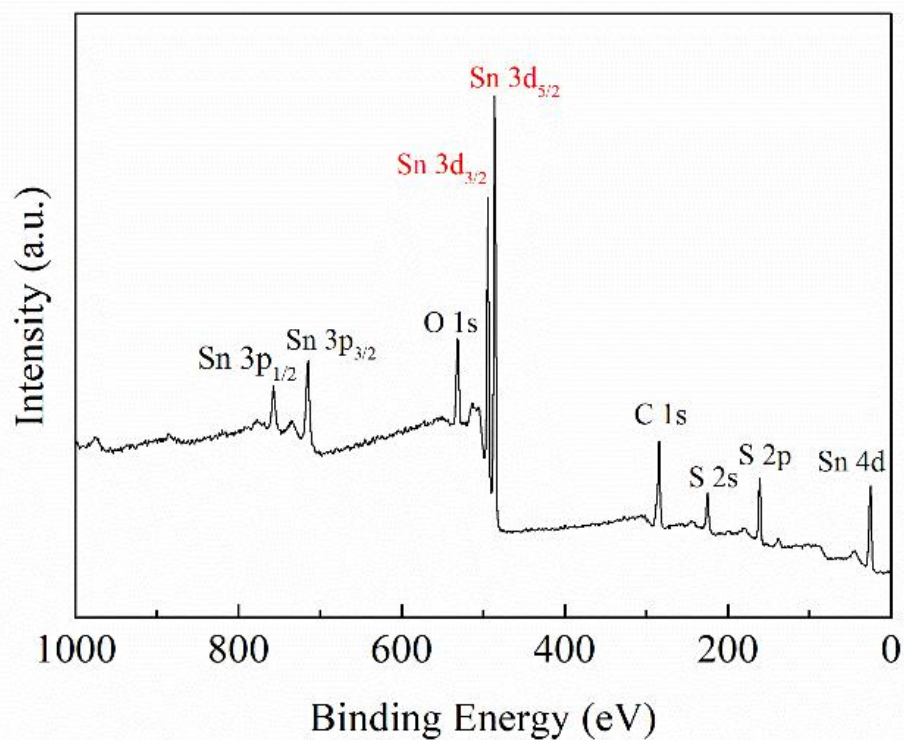

Figure SI9 The full scanning XPS spectrum of SnS<sub>2</sub>.

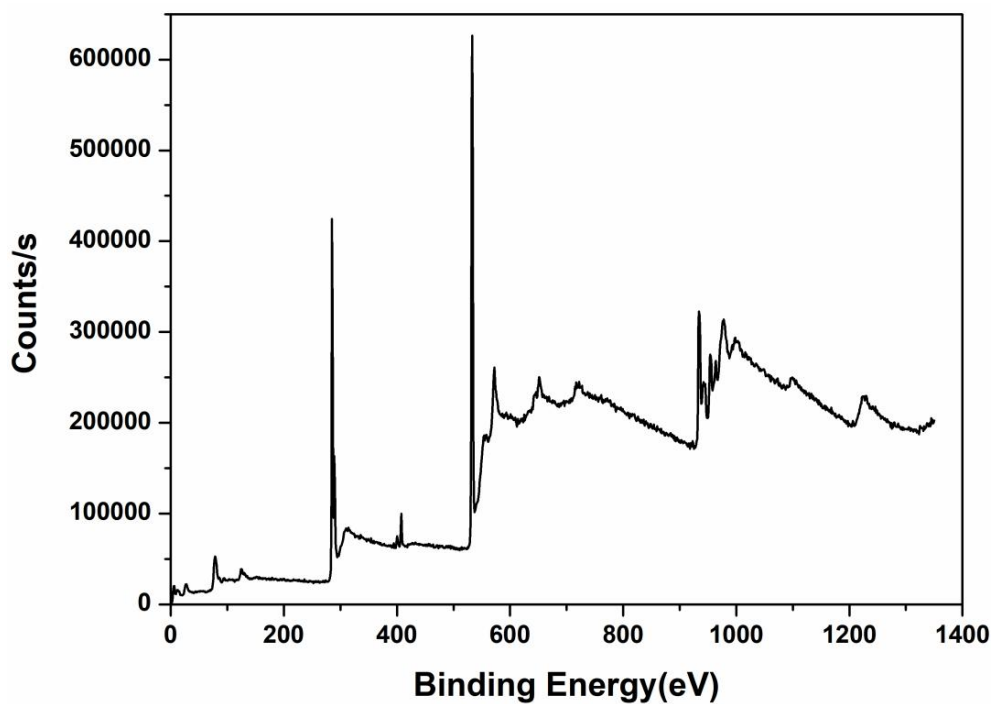

Figure SI10 The full scanning XPS spectrum of HKUST-1.

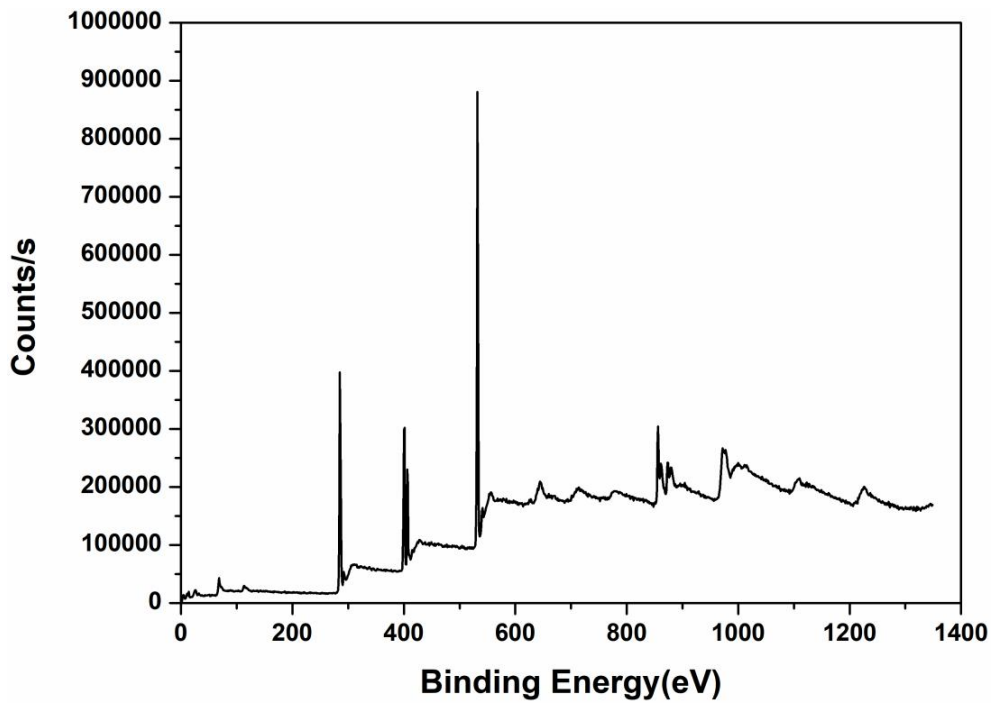

Figure SI11 The full scanning XPS spectrum of Ni-MOF.

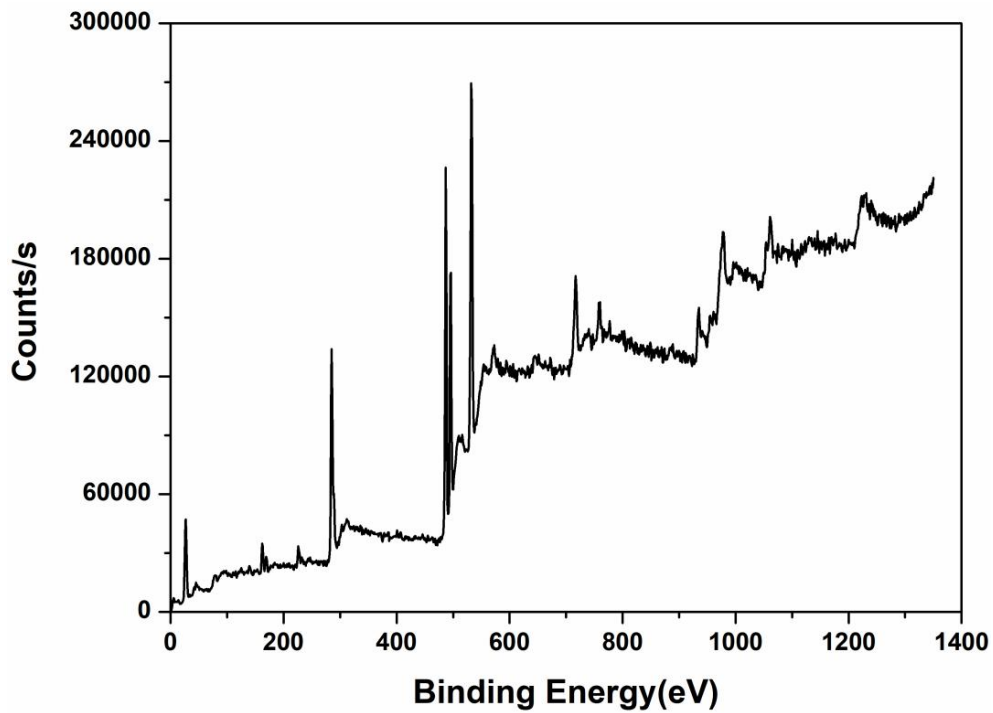

Figure SI12 The full scanning XPS spectrum of SnS<sub>2</sub>@HKUST-1.

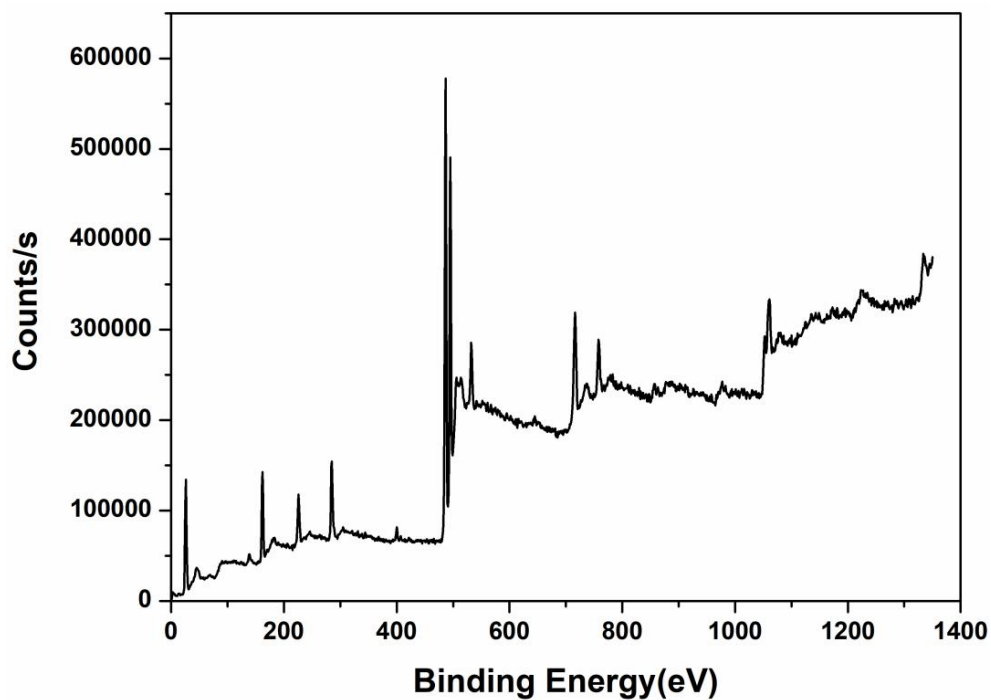

Figure SI13 The full scanning XPS spectrum of SnS<sub>2</sub>@Ni-MOF.

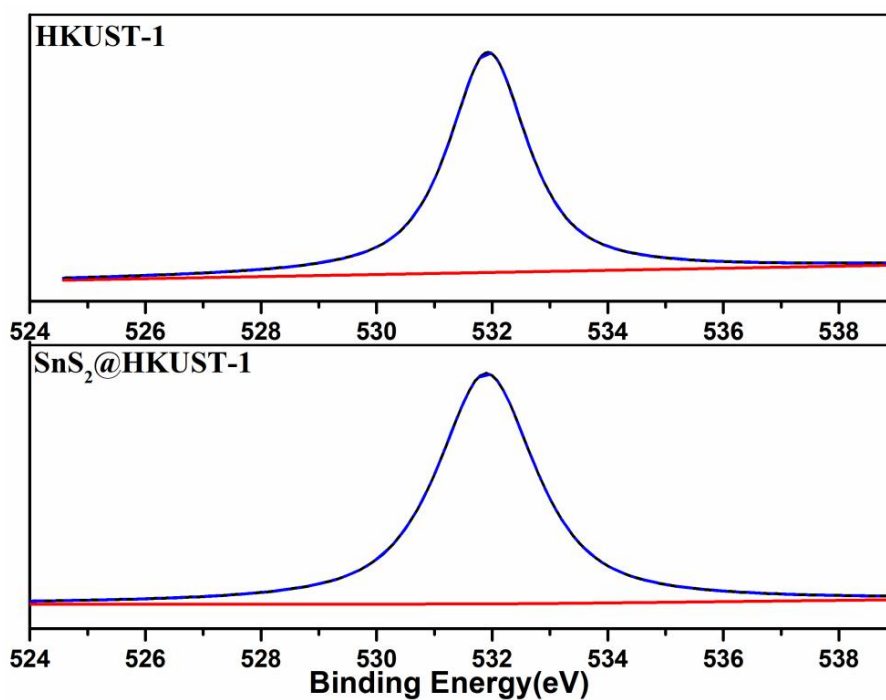

Figure SI14 The O 1s spectrum.



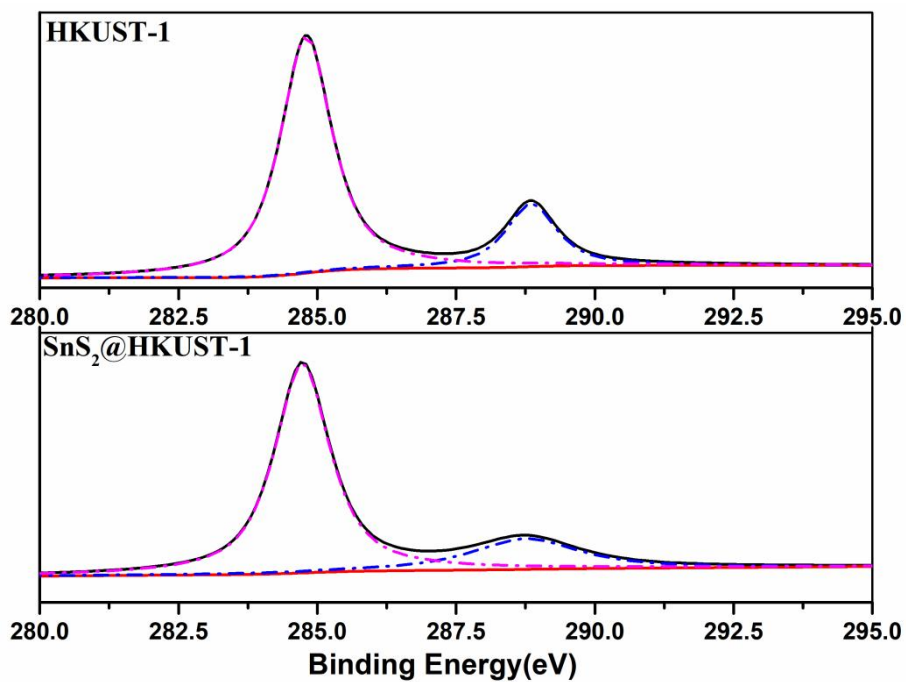

Figure SI15 The C 1s spectrum SnS<sub>2</sub>@HKUST-1.

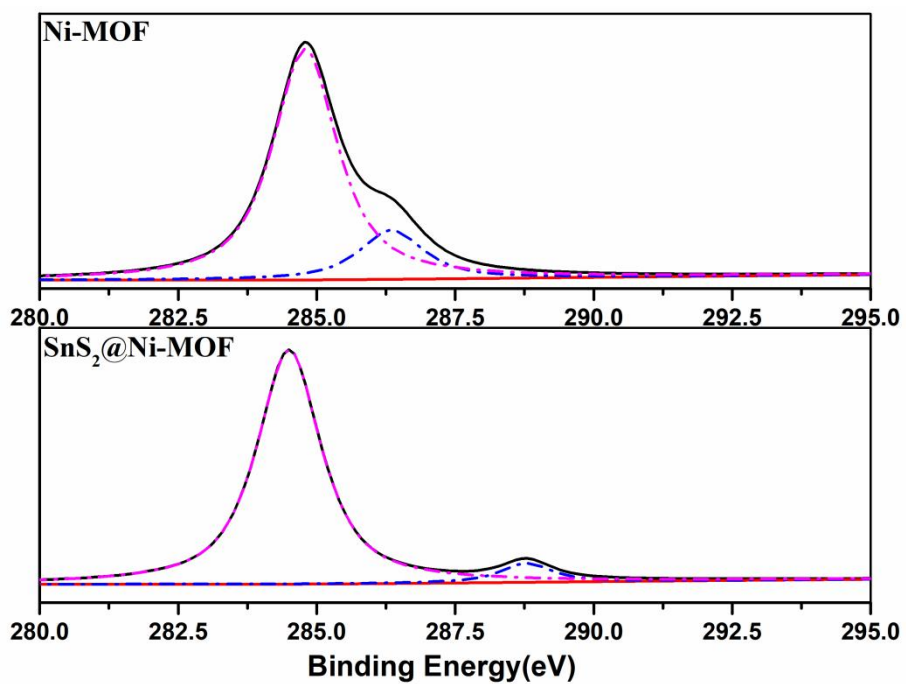

Figure SI16 The C 1s spectrum of SnS<sub>2</sub>@Ni-MOF.

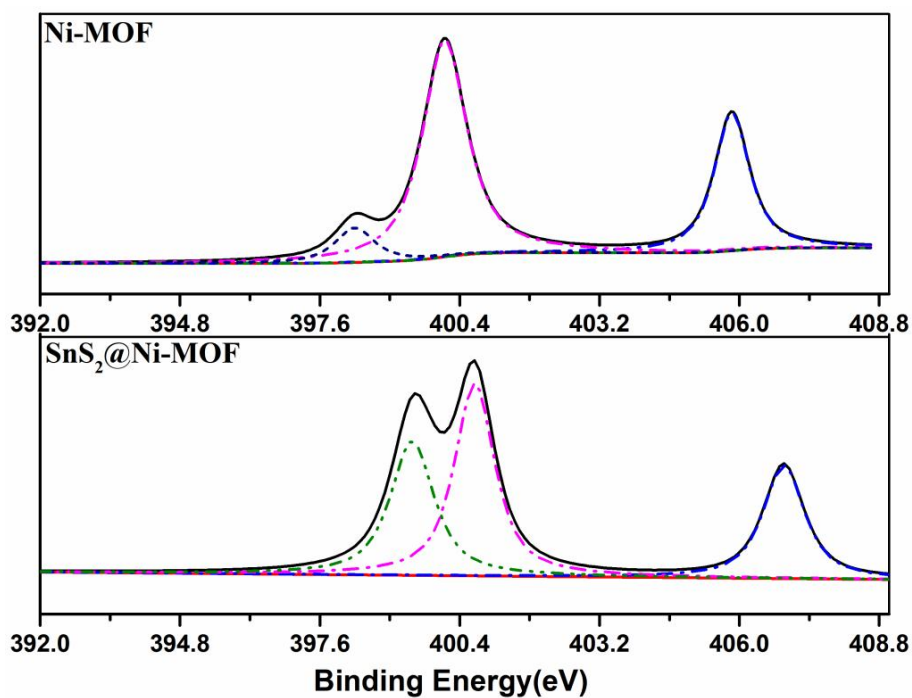

Figure SI17 The N 1s spectrum.

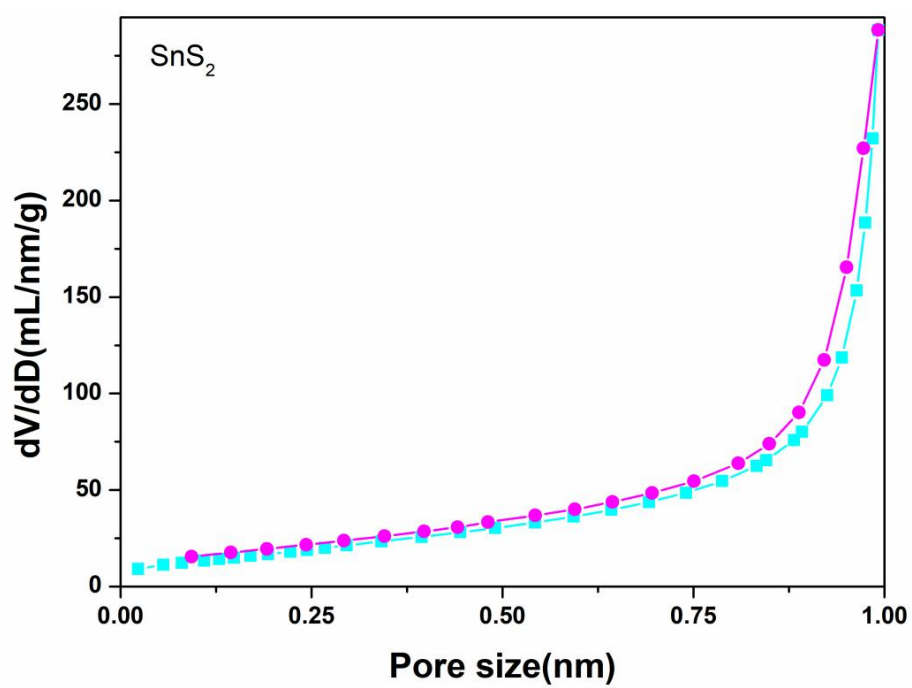

Figure SI18 The N<sub>2</sub> adsorption-desorption isotherm of SnS<sub>2</sub>.

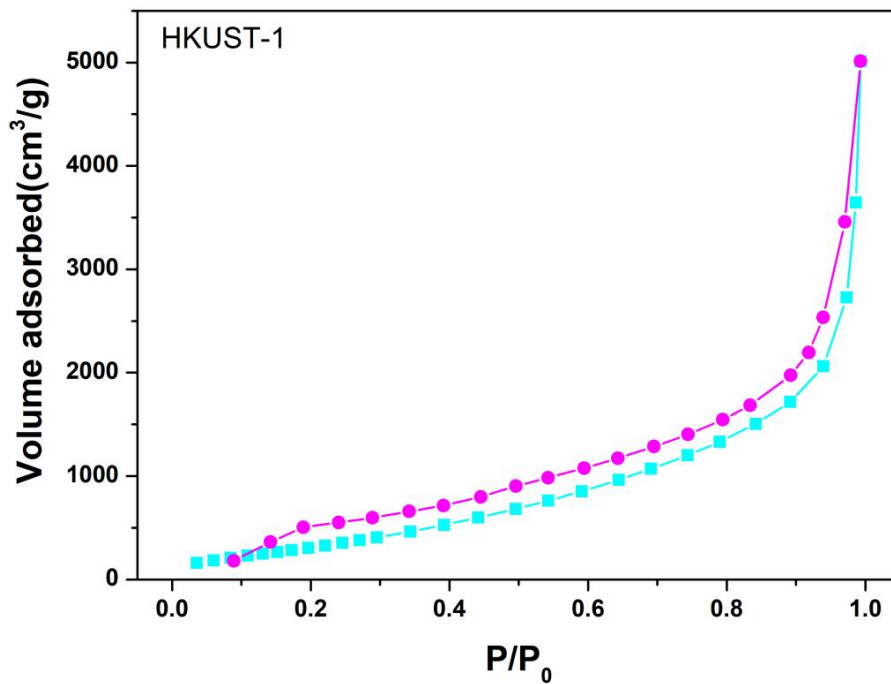

Figure SI19 The N<sub>2</sub> adsorption-desorption isotherm of HKUST-1.

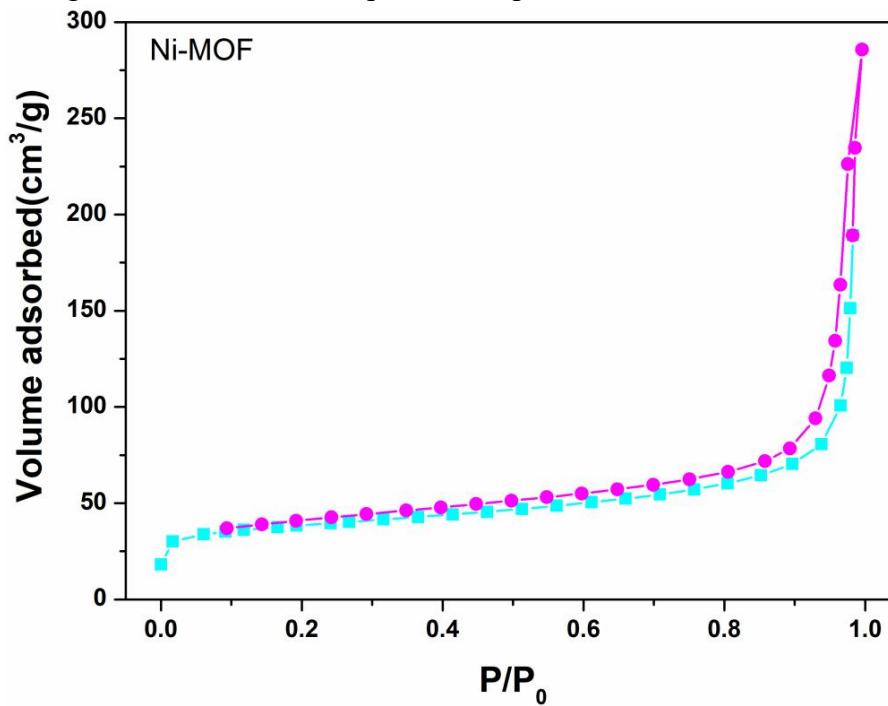

Figure SI20 The N<sub>2</sub> adsorption-desorption isotherm of Ni-MOF.

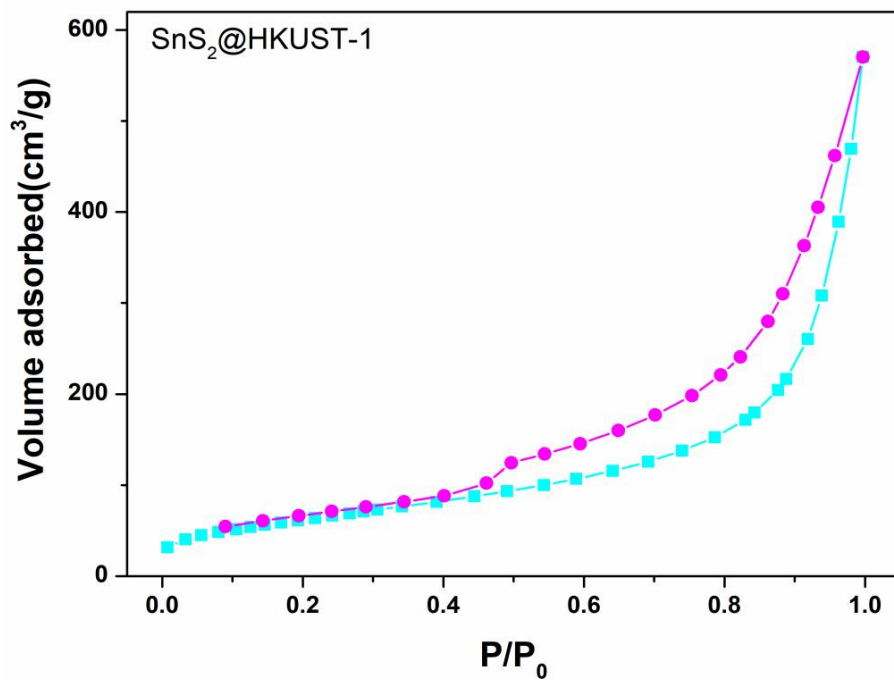

Figure SI21 The N<sub>2</sub> adsorption-desorption isotherm of SnS<sub>2</sub>@HKUST-1.

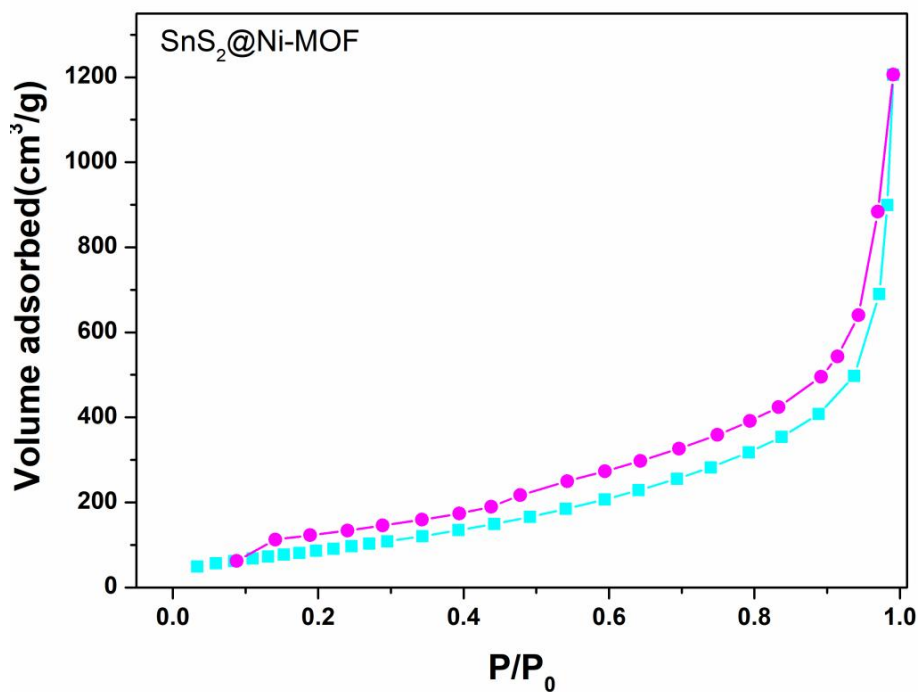

Figure SI22 The N<sub>2</sub> adsorption-desorption isotherm of SnS<sub>2</sub>@Ni-MOF.

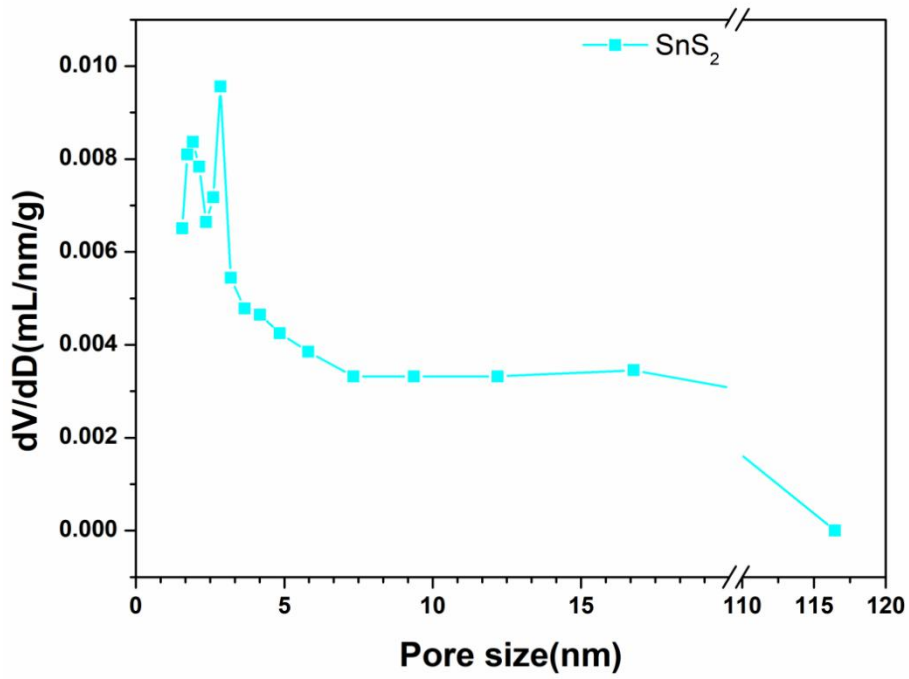

Figure SI23 The average pore sizes of SnS<sub>2</sub>.

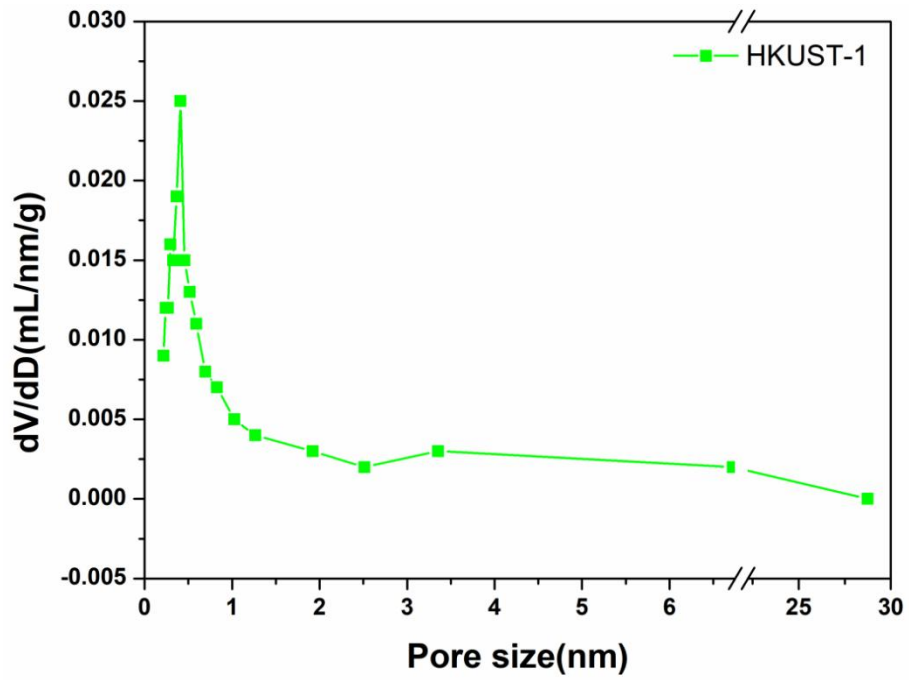

Figure SI24 The average pore sizes of HKUST-1.



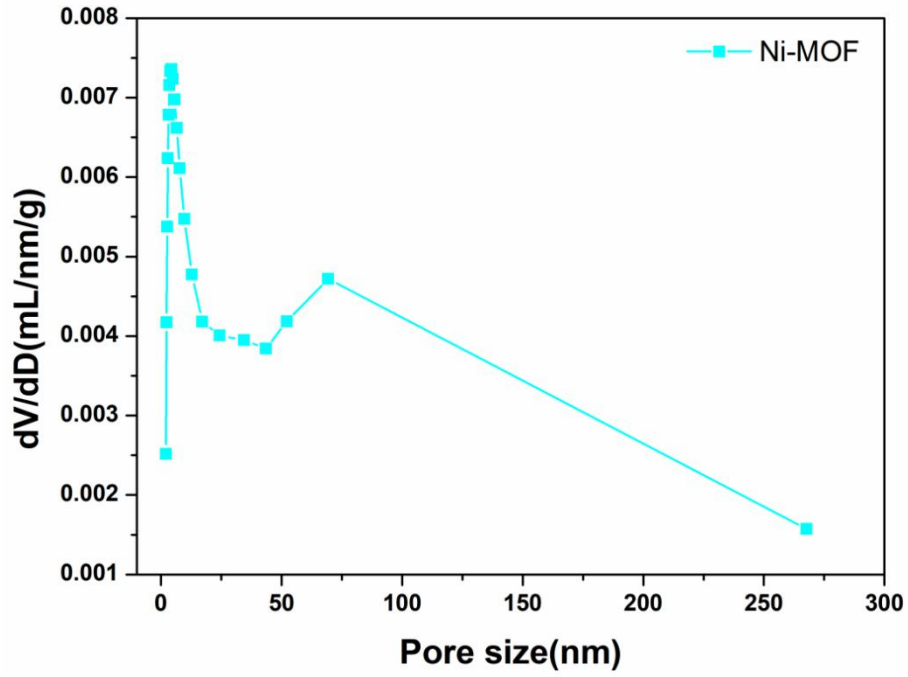

Figure SI25 The average pore sizes of Ni-MOF.

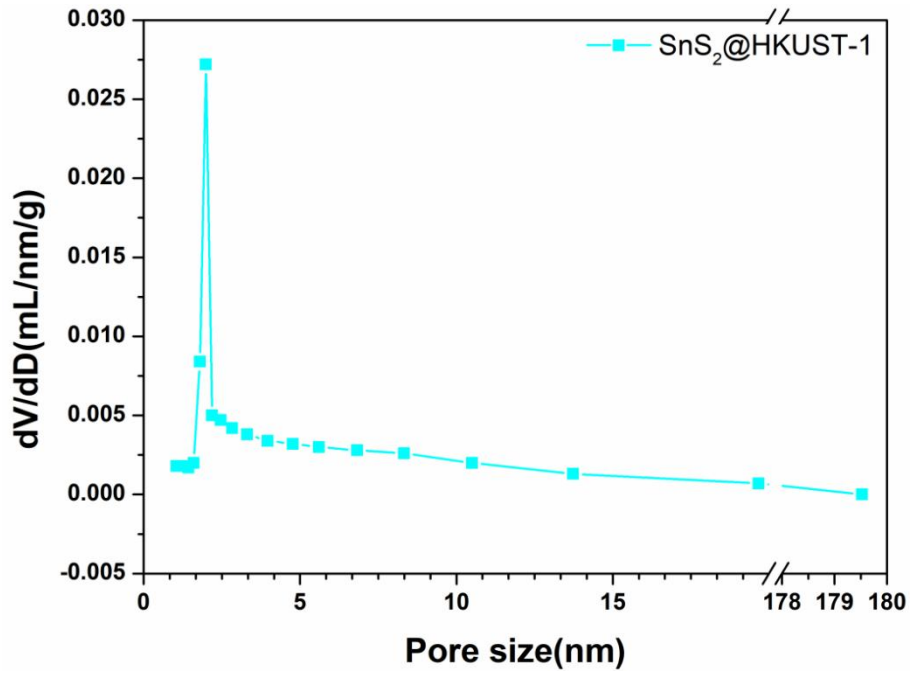

Figure SI26 The average pore sizes of SnS<sub>2</sub>@HKUST-1.

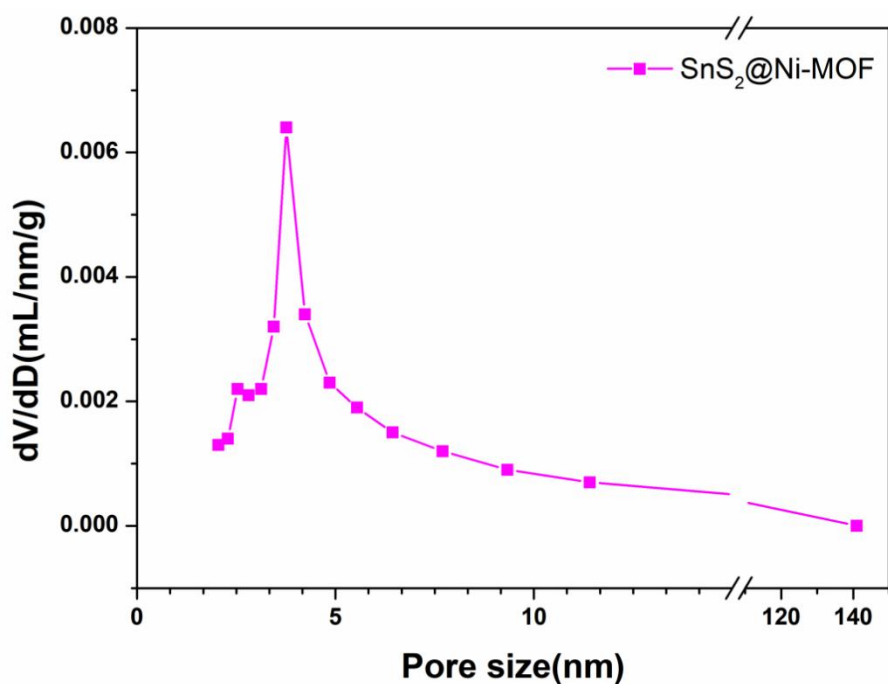

Figure SI27 The average pore sizes of SnS<sub>2</sub>@Ni-MOF.

**Table SI1** The LSV curves of the five different SnS<sub>2</sub> samples

| Sample number      | S1  | S2  | S4  | S6  | S8  |
|--------------------|-----|-----|-----|-----|-----|
| Overpotential (mV) | 262 | 272 | 292 | 202 | 181 |

**Table SI2** The summary of catalysts for HER.

| materials                                         | cycling stability        | Electrolyte                         | Overpotentia l (mV) | Tafel slope (mV/dec) | Cdl (mF/cm <sup>2</sup> ) | Ref |
|---------------------------------------------------|--------------------------|-------------------------------------|---------------------|----------------------|---------------------------|-----|
| MoS <sub>2</sub> NPs/Sn S <sub>2</sub> NS         | negligible (500 cycles)  | 0.5M H <sub>2</sub> SO <sub>4</sub> | 249mV               | 42.1 mV/dec          | -                         | 1   |
| SnS <sub>2</sub>                                  | negligible (1000 cycles) | 0.5M H <sub>2</sub> SO <sub>4</sub> | 250mV               | -                    | 0.226mF/cm <sup>2</sup>   | 2   |
| MoS <sub>2</sub> /SnS <sub>2</sub> heterojunction | Negligible (1000 cycles) | 0.5M H <sub>2</sub> SO <sub>4</sub> | 288mV               | 50 mV/dec            | 7.82 mF/cm <sup>2</sup>   | 3   |
| SnS <sub>2</sub> -1500C                           | Negligible (2000 cycles) | 0.5M H <sub>2</sub> SO <sub>4</sub> | 117mV               | 69 mV/dec            | 16.79mF/cm <sup>2</sup>   | 4   |
| CTS (S)                                           | Negligible (2000 cycles) | 0.5M H <sub>2</sub> SO <sub>4</sub> | 230mV               | 76 mV/dec            | 0.53mF/cm <sup>2</sup>    | 5   |
| 4% PANI/SnS <sub>2</sub>                          | -                        | 0.5M H <sub>2</sub> SO <sub>4</sub> | -                   | 66 mV/dec            | 0.85mF/cm <sup>2</sup>    | 6   |

|                                       |                          |                                     |       |              |                         |    |
|---------------------------------------|--------------------------|-------------------------------------|-------|--------------|-------------------------|----|
| Ni-Co-S-340(60)                       | -                        | 1M KOH                              | 129mV | 96.1 mV/dec  | 23.3mF/cm <sup>2</sup>  | 7  |
| Ni-CNTs                               | -                        | 0.5M H <sub>2</sub> SO <sub>4</sub> | 261mV | 88mV/dec     | -                       | 8  |
| Ni@NC6-600                            | Negligible (1000 cycles) | 1M KOH                              | 181mV | 119.3 mV/dec | 10.4 mF/cm <sup>2</sup> | 9  |
| Ni/Ni <sub>3</sub> S <sub>2</sub> @CN | Negligible (2000 cycles) | 1M KOH                              | 141mV | 91 mV/dec    | 22.3 mF/cm <sup>2</sup> | 10 |
| Ni-MOF/NC-800                         | Negligible (2000 cycles) | 0.5M H <sub>2</sub> SO <sub>4</sub> | 369mV | 127.1 mV/dec | -                       | 11 |
| NPC-sheet@NF                          | -                        | 1M KOH                              | 97mV  | 64.8 mV/dec  | 33.6 mF/cm <sup>2</sup> | 12 |
| Cu <sub>3</sub> P@NiFe-MOF-4          | -                        | 1M KOH                              | 175mV | 131 mV/dec   | -                       | 13 |
| NiSe <sub>2</sub> -600@NC             | Negligible (1000 cycles) | 0.5M H <sub>2</sub> SO <sub>4</sub> | 196mV | 45 mV/dec    | 3.12 mF/cm <sup>2</sup> | 14 |
| Co-MOF@Zn-800                         | Negligible (3000 cycles) | 0.5M H <sub>2</sub> SO <sub>4</sub> | 218mV | 146.6 mV/dec | -                       | 15 |
| Pd/MOF                                | Negligible (1000 cycles) | 0.5M H <sub>2</sub> SO <sub>4</sub> | 105mV | 85mV/dec     | -                       | 16 |
| Cu <sub>2-x</sub> S/CNFs              | Negligible (2000 cycles) | 1M KOH                              | 276mV | 59 mV/dec    | 29.3 mF/cm <sup>2</sup> | 17 |
| Cu <sub>3</sub> P/C-300               | Negligible (2000 cycles) | 1MKOH                               | 233mV | 91 mV/dec    | 0.7 mF/cm <sup>2</sup>  | 18 |
| 10% Mo-SnS                            | negligible(3000 cycles)  | 0.5M H <sub>2</sub> SO <sub>4</sub> | 377mV | 100 mV/dec   | -                       | 19 |
| SnS <sub>2</sub> /G                   | -                        | 1M KOH                              | 360mV | 257 mV/dec   | 0.9 mF/cm               | 20 |
| Vs-SnS <sub>2</sub>                   | -                        | 0.5M H <sub>2</sub> SO <sub>4</sub> | 141mV | 74 mV/dec    | -                       | 21 |
| Mn-SnS <sub>2</sub> /NF               | Negligible (2000 cycles) | 1M KOH                              | 71mV  | 72 mV/dec    | 26.72 mF/cm             | 22 |
| MoSe <sub>2</sub> /SnS <sub>2</sub>   | -                        | 1M KOH                              | 285mV | 109 mV/dec   | -                       | 23 |
| SnS <sub>2</sub> -Pt-3                | Negligible (1000 cycles) | 0.5M H <sub>2</sub> SO <sub>4</sub> | 210mV | 126 mV/dec   | 6.3 mF/cm               | 24 |

**Table SI3** The Tafel slope of the five different SnS<sub>2</sub> samples

| Sample number                       | S1  | S2  | S4  | S6  | S8  |
|-------------------------------------|-----|-----|-----|-----|-----|
| Tafel slope (mV·dec <sup>-1</sup> ) | 113 | 103 | 110 | 104 | 106 |

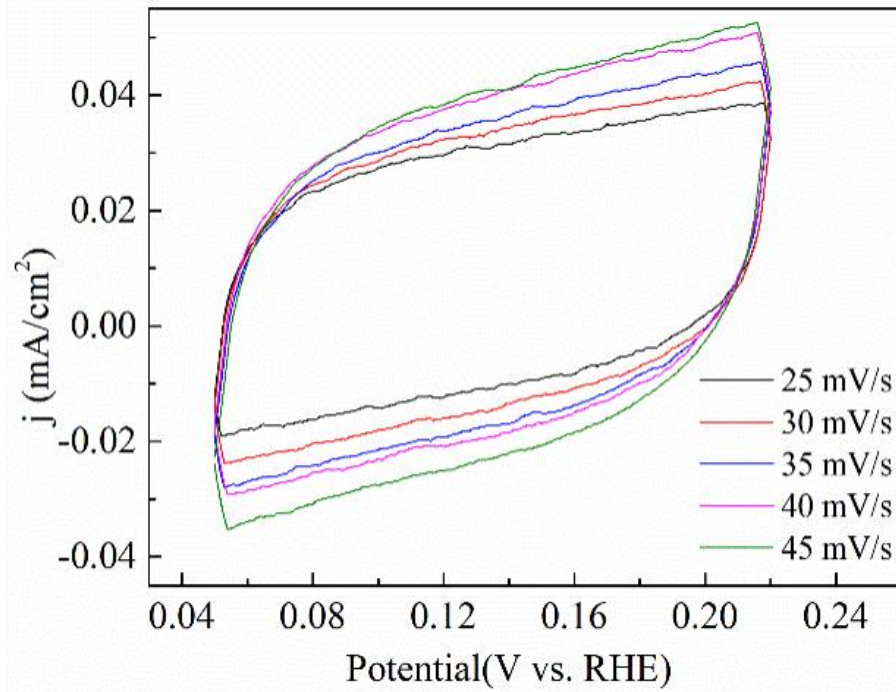

Figure SI28 The CV curves for S1.

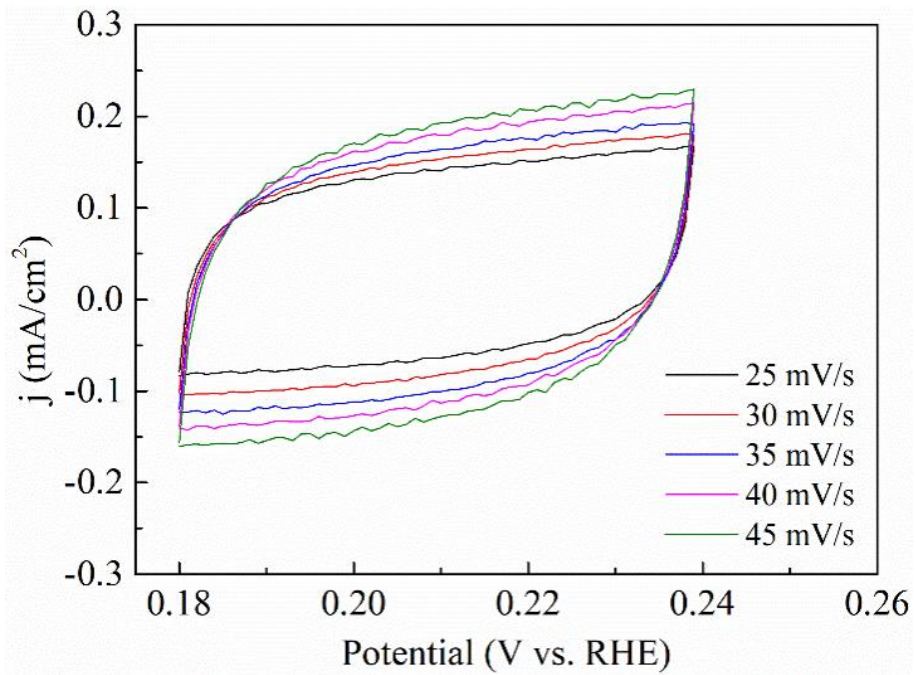

Figure SI29 The CV curves for S2.

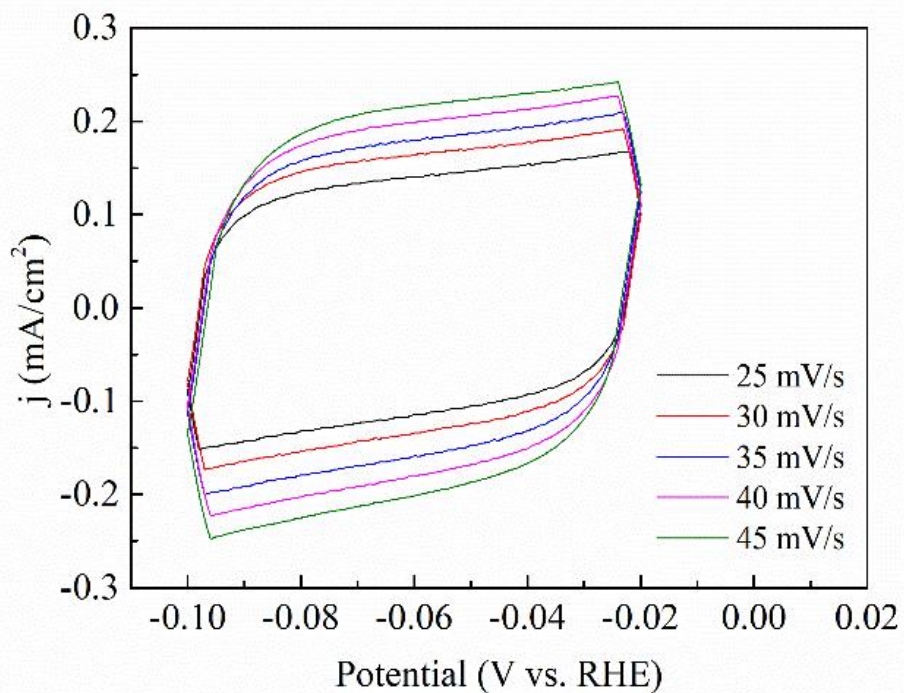

Figure SI30 The CV curves for S4.

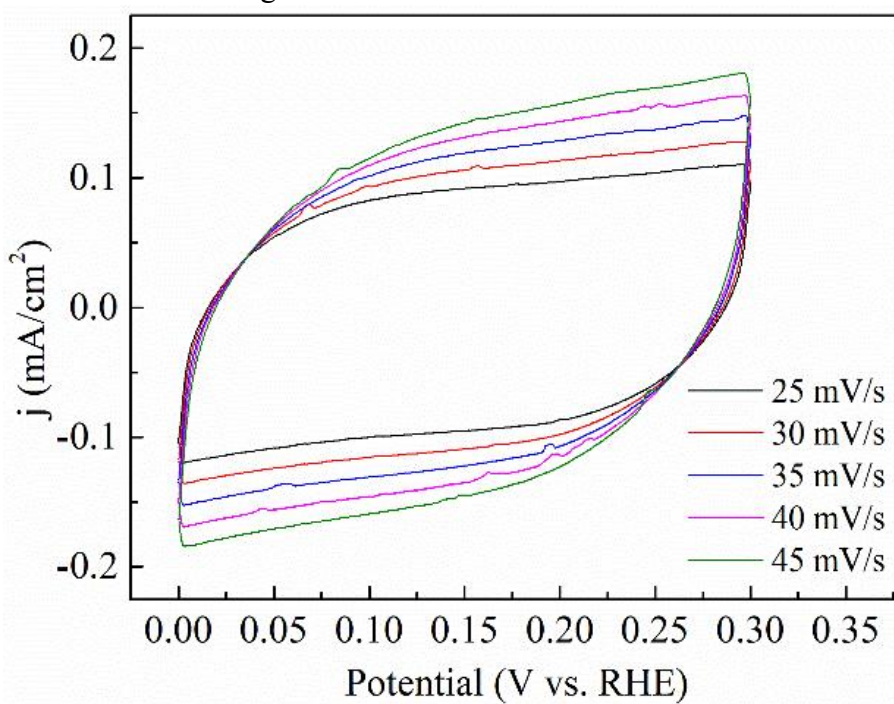

Figure SI31 The CV curves for S6.



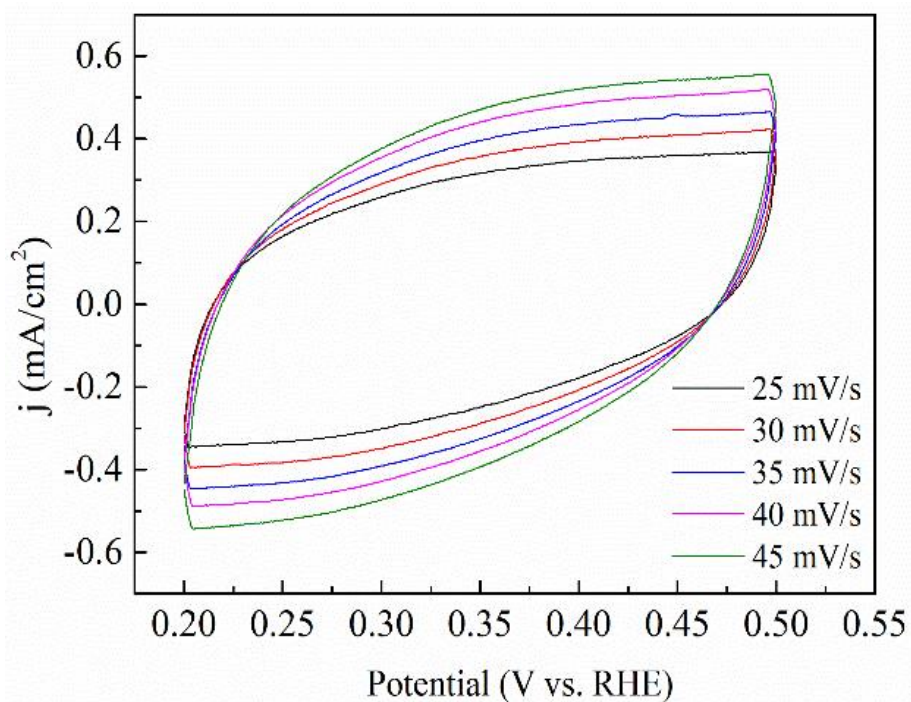

Figure SI32 The CV curves for S8.

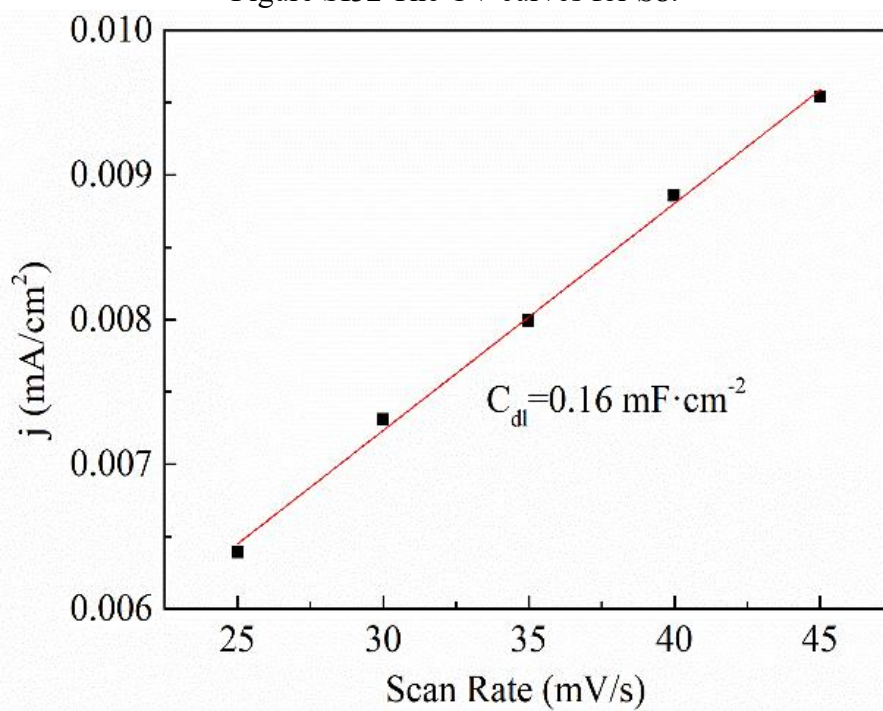

Figure SI33 The  $C_{dl}$  values for S1.

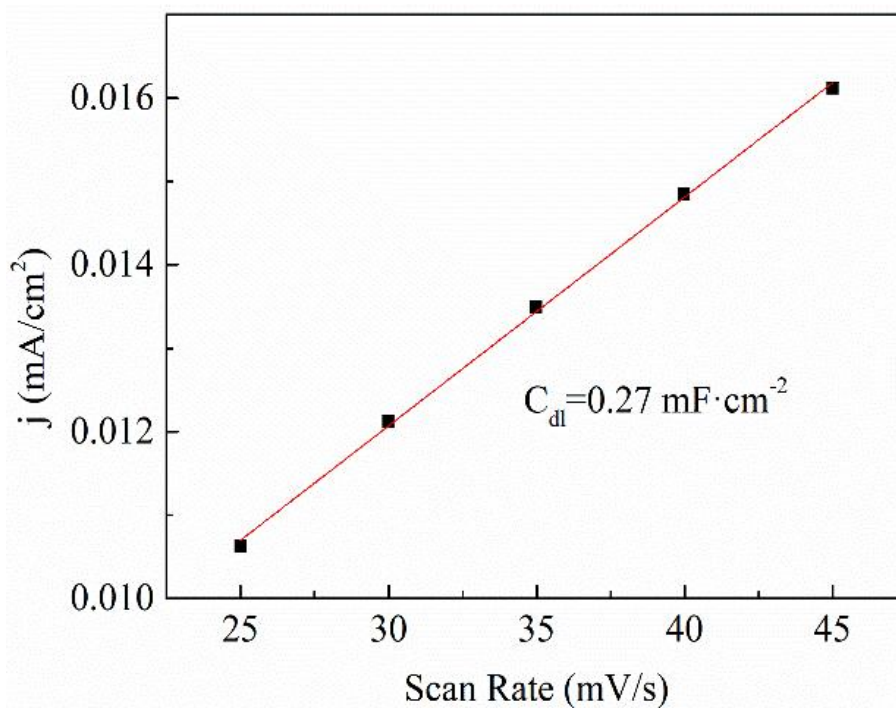

Figure SI34 The Cdl values for S2.

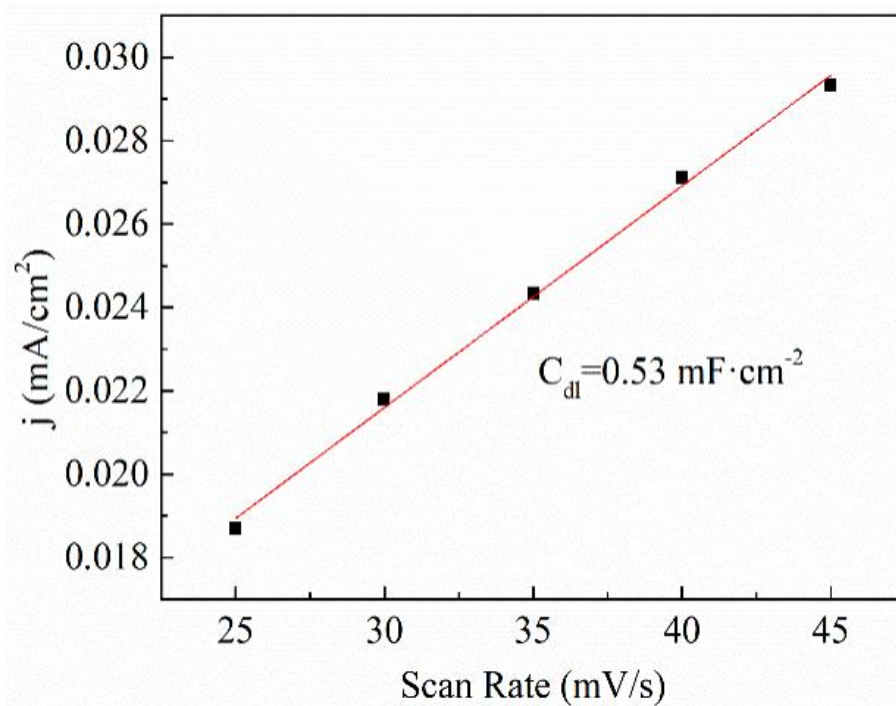

Figure SI35 The Cdl values for S4.

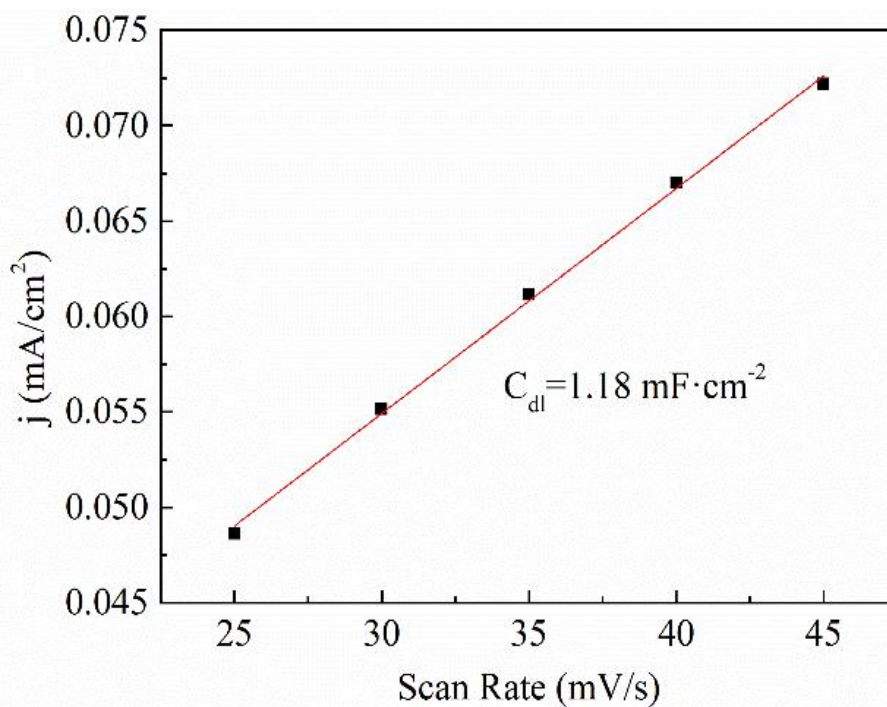

Figure SI36 The Cdl values for S6.

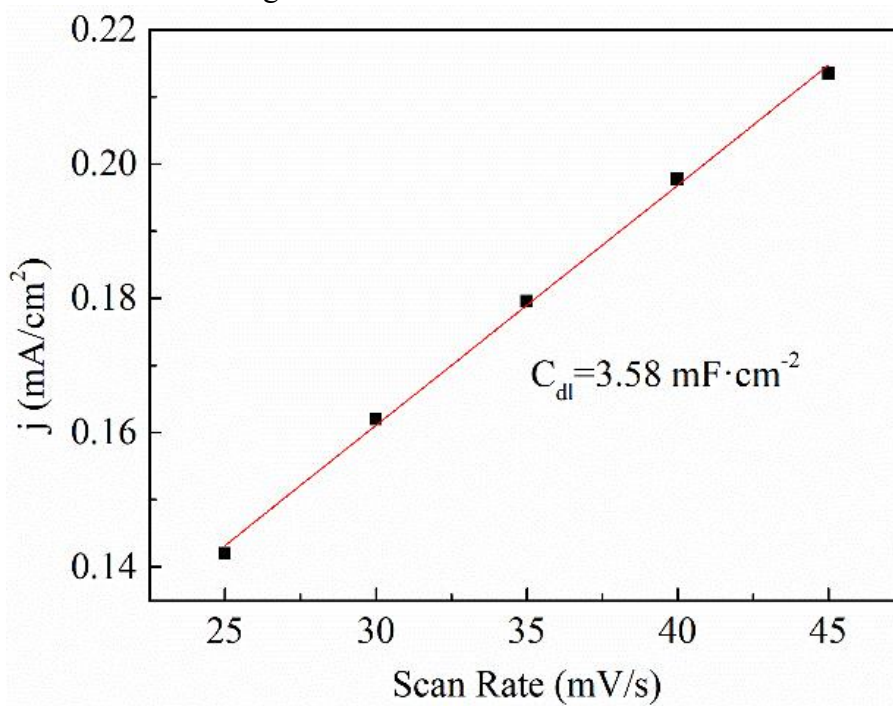

Figure SI37 The Cdl values for S8.

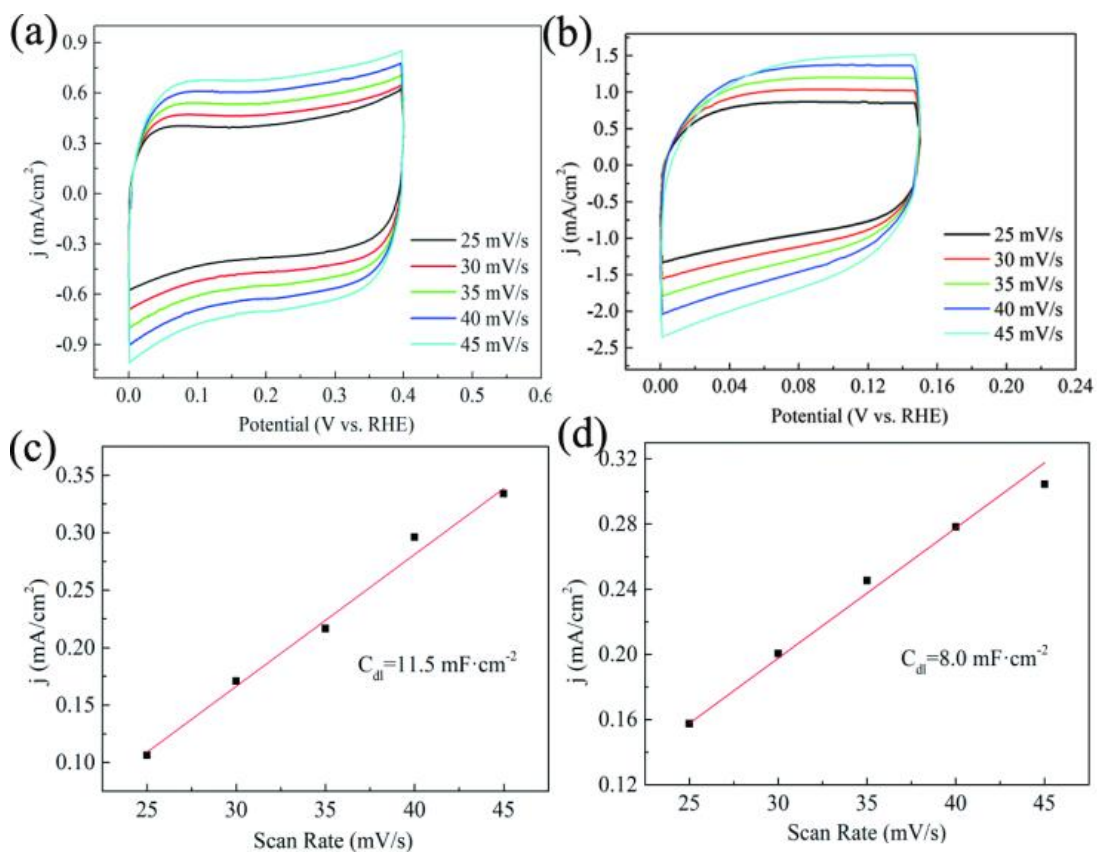

Figure SI38 (a) The CV curves of SnS2@Ni-MOF. (b) The CV curves of SnS2@HKUST-1 (c) The  $C_{dl}$  values for SnS2@Ni-MOF. (d) The  $C_{dl}$  values for SnS2@HKUST-1.

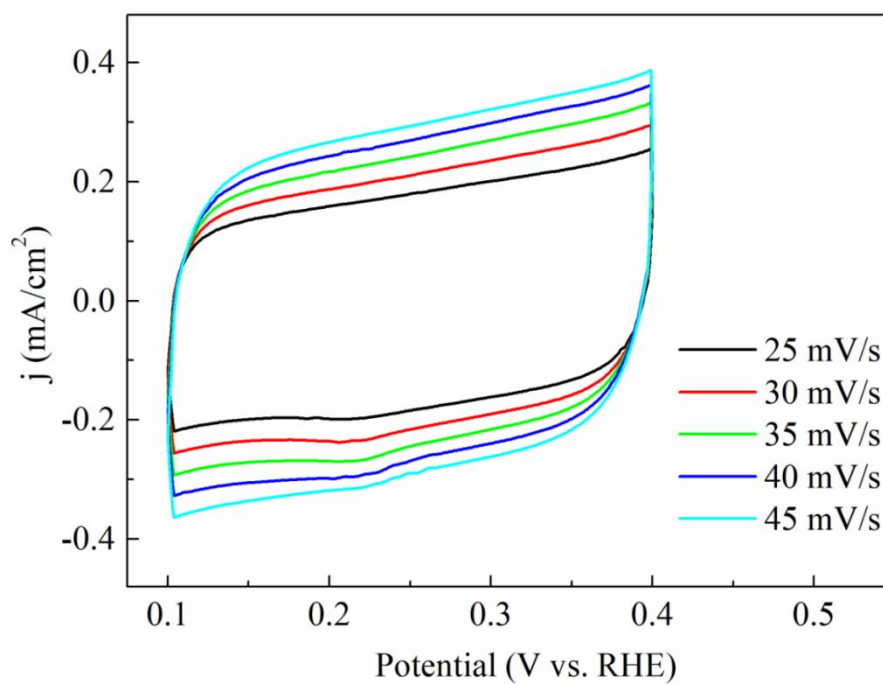

Figure SI39 The CV curves for Ni-MOF.

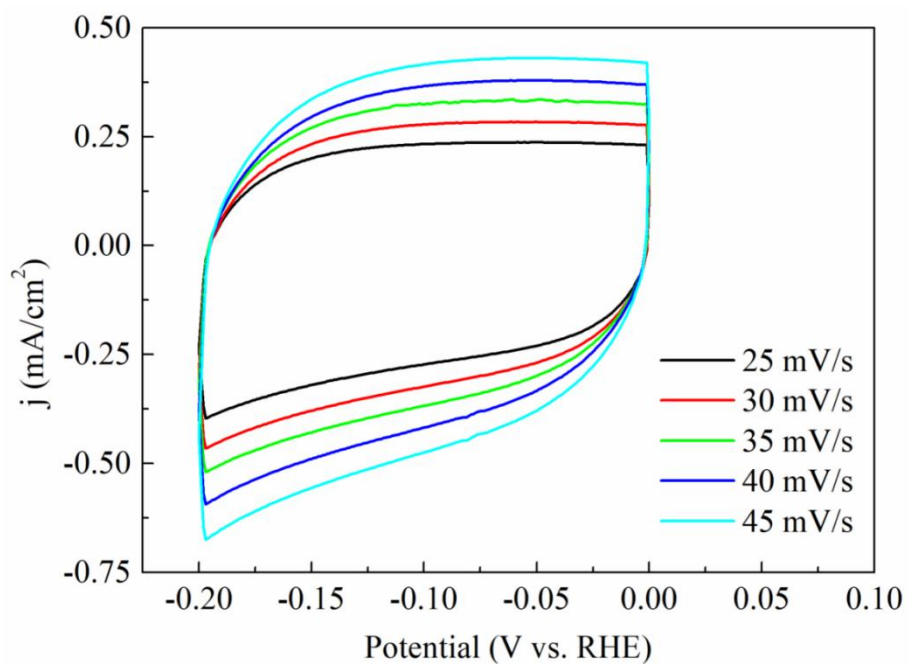

Figure SI40 The CV curves for HKUST-1.

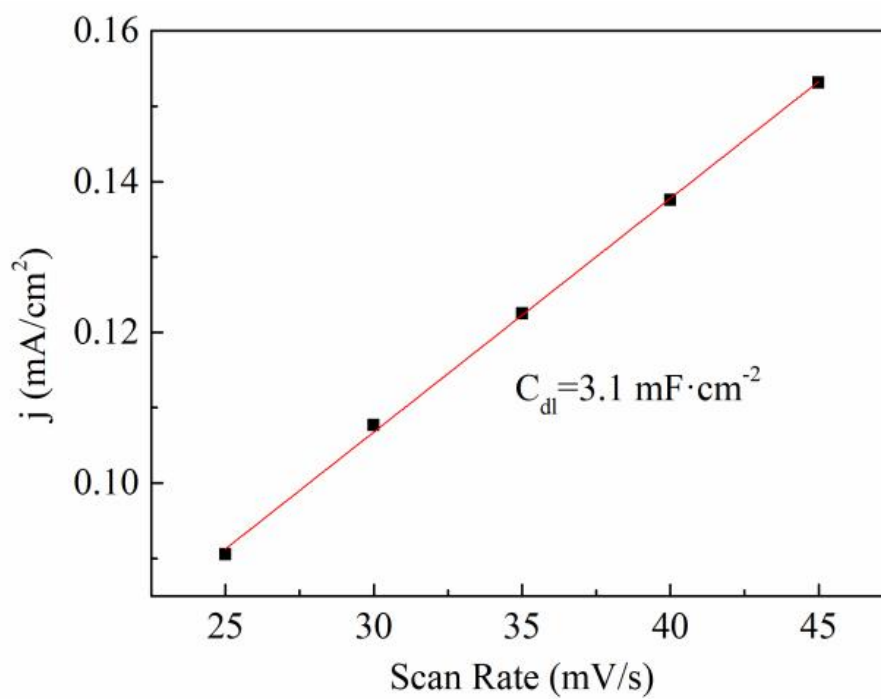

Figure SI41 The  $C_{dl}$  values for Ni-MOF.



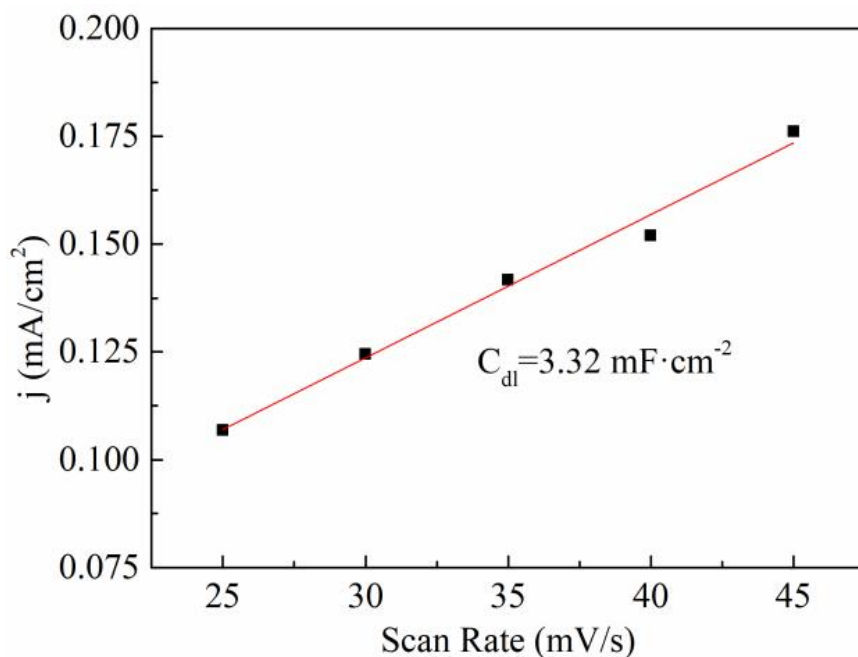

Figure SI42 The Cdl values for HKUST-1.

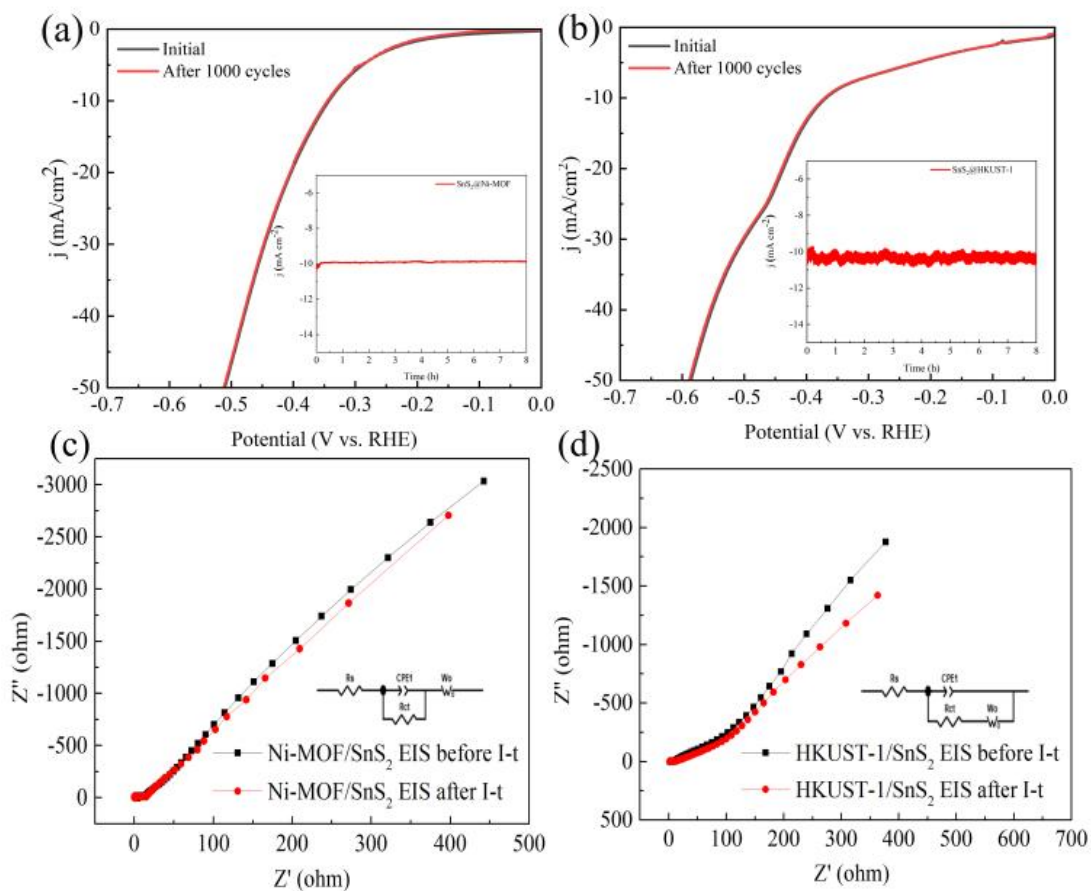

Figure SI43 (a) The polarization curves of SnS<sub>2</sub>@Ni-MOF before and after 1000 cycles; inset shows the chronopotentiometric curve @ 10 mA cm<sup>-2</sup> for 8 h. (b) The polarization curves of SnS<sub>2</sub>@HKUST-1 before and after 1000 cycles; inset shows the chronopotentiometric curve @ 10 mA cm<sup>-2</sup> for 8 h. (c) The SnS<sub>2</sub>@Ni-MOF EIS before and after I-t. (d) The SnS<sub>2</sub>@HKUST-1 EIS before and after I-t.

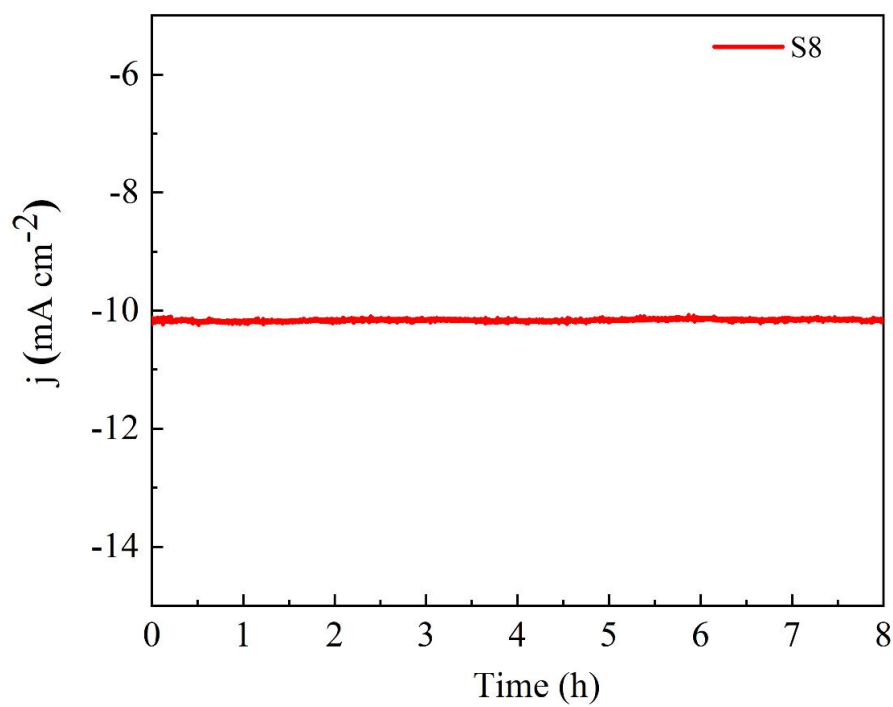

Figure SI44 The stability of SnS<sub>2</sub> (S8).

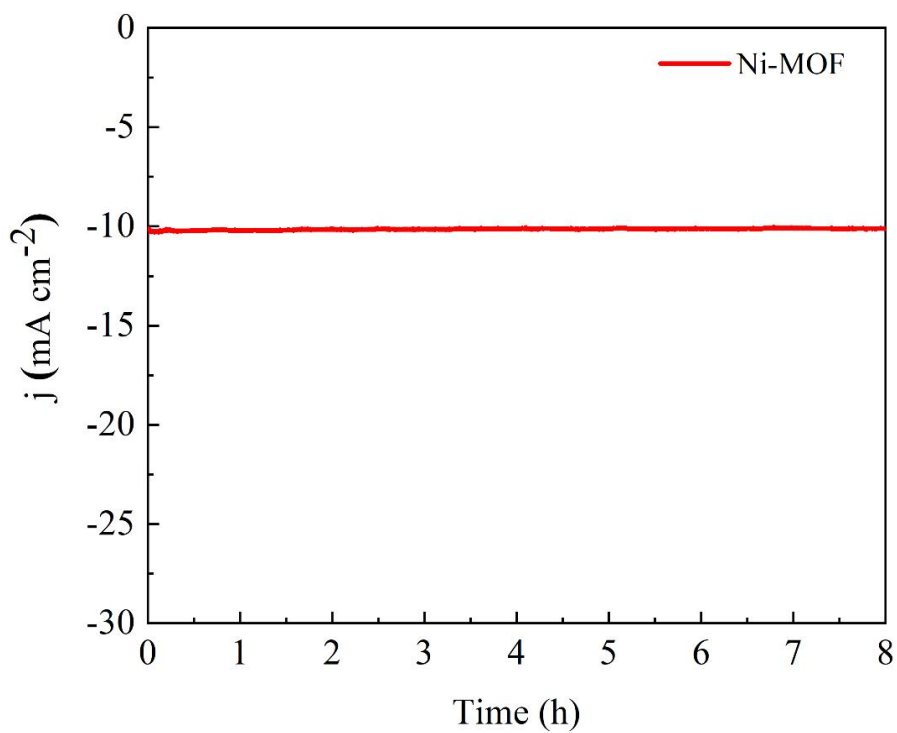

Figure SI45 The stability of Ni-MOF.

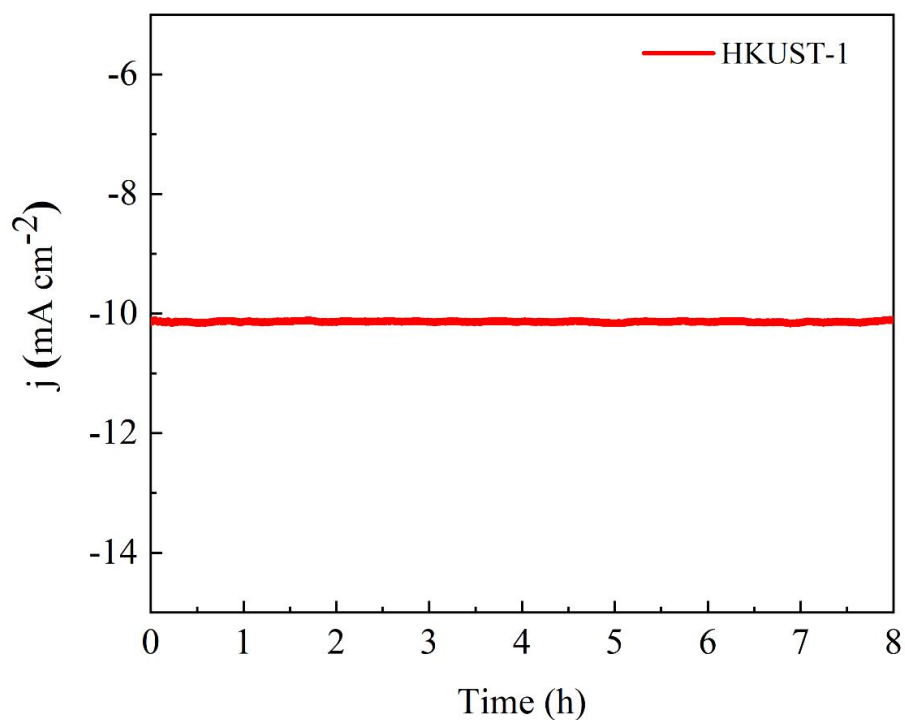

Figure SI46 The stability of HKUST-1.

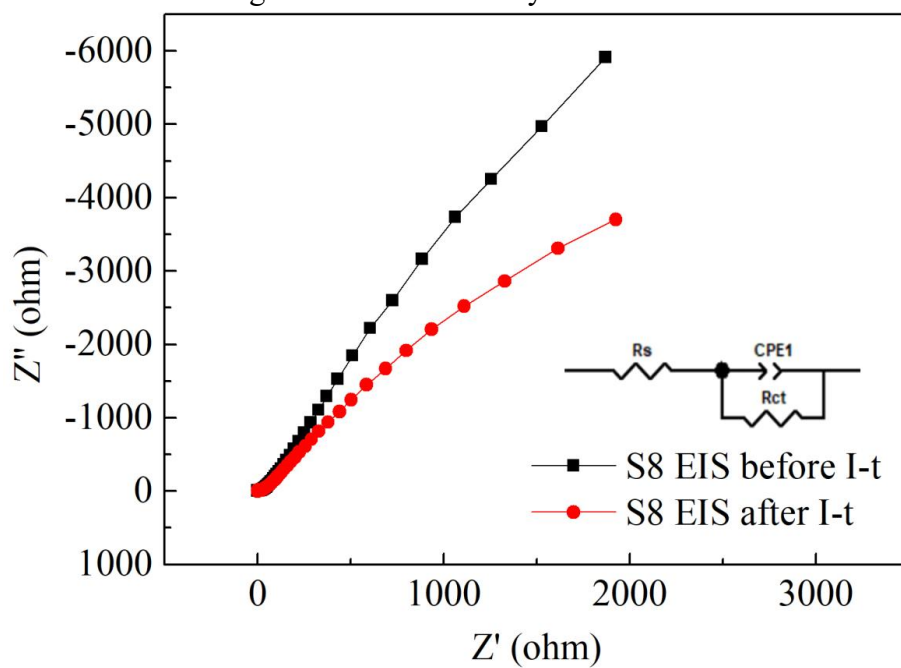

Figure SI47 The SnS<sub>2</sub> EIS before and after I-t.

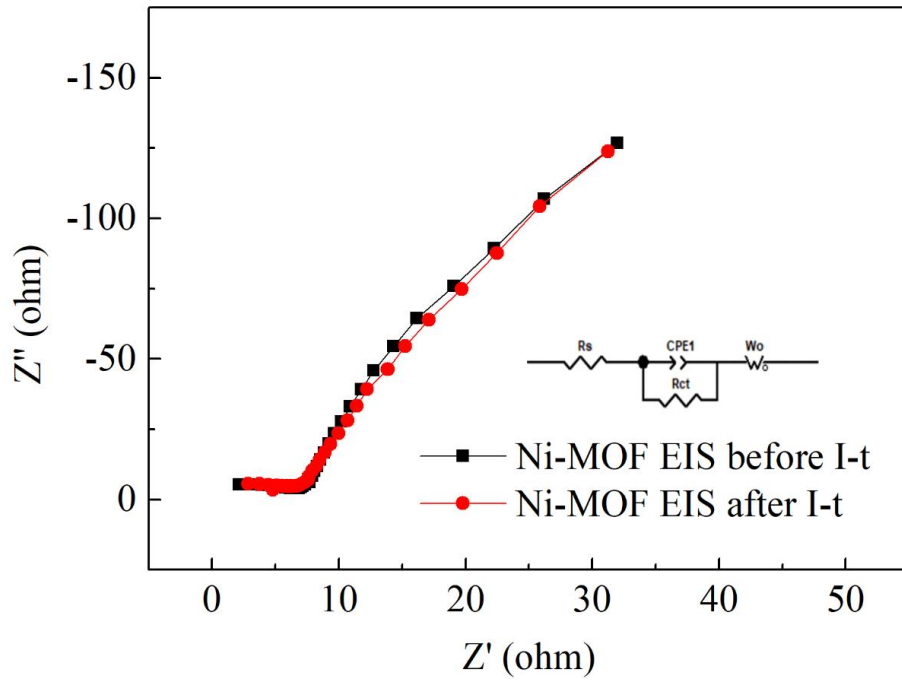

Figure SI48 The Ni-MOF EIS before and after I-t.

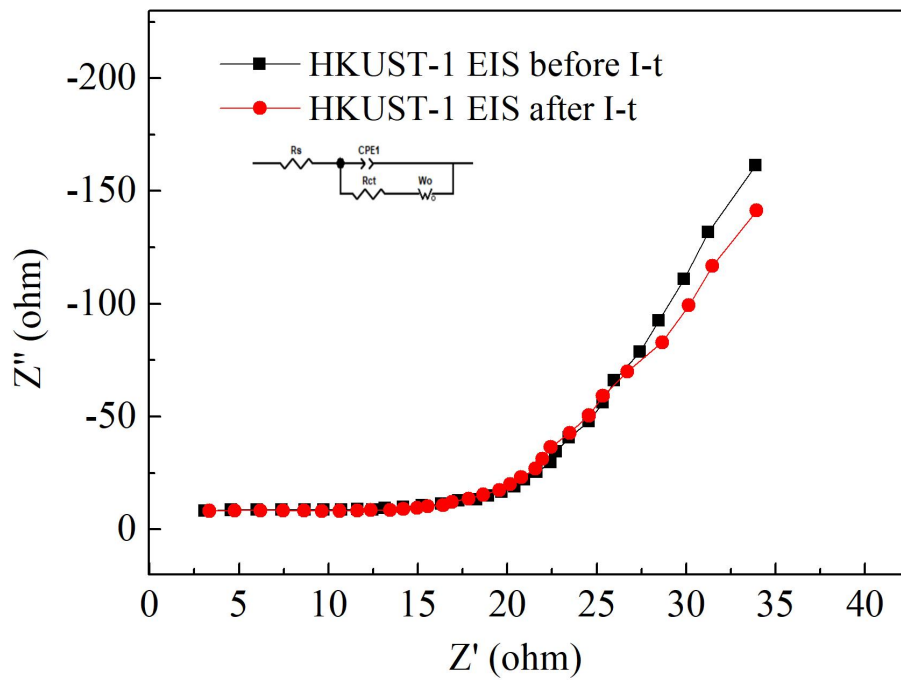

Figure SI49 The HKUST-1 EIS before and after I-t.

**Table SI4** ICP-MS determination results Concentration of S, Sn and Ni in electrolyte solution after electrochemical test.

| sample                   | Value type | S          | Sn | Ni |
|--------------------------|------------|------------|----|----|
| Ni-MOF                   | Reported   | 15726 mg/L | /  | /  |
| SnS <sub>2</sub> @Ni-MOF | Reported   | 15292mg/L  | /  | /  |

## References

- [1] L. Hu, X.-F. Song, S.-L. Zhang, H.-B. Zeng, X.-J. Zhang, R. Marks and D. Shan, *Journal of Catalysis*, 2018, 366, 8-15.
- [2] H. Song, H. Wu, Y. Gao, K. Wang, X. Su, S. Yan and Y. Shi, *Journal*, 2019, 9.
- [3] X. Xiao, Y. Wang, X. Xu, T. Yang and D. Zhang, *Molecular Catalysis*, 2020, 487, 110890.
- [4] G. Liu, Y. Qiu, Z. Wang, J. Zhang, X. Chen, M. Dai, D. Jia, Y. Zhou, Z. Li and P. Hu, *ACS Applied Materials & Interfaces*, 2017, 9, 37750-37759.
- [5] V. Maheskumar, P. Gnanaprakasam, T. Selvaraju and B. Vidhya, *Journal of Electroanalytical Chemistry*, 2018, 826, 38-45.
- [6] Y. Zhang, L. Hu, H. Zhou, H. Wang and Y. Zhang, *ACS Applied Nano Materials*, 2022, 5, 391-400.
- [7] C. Wu, Y. Du, Y. Fu, W. Wang, T. Zhan, Y. Liu, Y. Yang and L. Wang, *Composites Part B: Engineering*, 2019, 177, 107252.
- [8] B. Thangavel, S. Berchmans and G. Venkatachalam, *Energy & Fuels*, 2021, 35, 1866-1873.
- [9] N. Cheng, N. Wang, L. Ren, G. Casillas-Garcia, N. Liu, Y. Liu, X. Xu, W. Hao, S. X. Dou and Y. Du, *Carbon*, 2020, 163, 178-185.
- [10] J. Tian, Y. Xu, J. Li, J. Chi, L. Feng, Q. Pan, X. Li and Z. Su, *Journal of Solid State Chemistry*, 2022, 313, 123287.
- [11] J.-L. Liu, X.-Y. Zhou, L. Qin, Y.-Q. Wang, H.-J. Zhu, G. Ni, M.-L. Ma and M.-D. Zhang, *Journal of Molecular Structure*, 2022, 1252, 132184.
- [12] H. Qu, Y. Ma, Z. Gou, B. Li, Y. Liu, Z. Zhang and L. Wang, *Journal of Colloid and Interface Science*, 2020, 572, 83-90.
- [13] E. Li, Q. Mou, Z. Xu, J. Ma, X. Liu, G. Cheng, P. Zhao and H. Li, *Catalysis Letters*, 2022, 152, 3825-3832.
- [14] N. Sahu, J. K. Das and J. N. Behera, *Inorganic Chemistry*, 2022, 61, 2835-2845.
- [15] L. Qin, J.-L. Liu, X.-Y. Zhou, Y.-Q. Wang, X. Sun and M.-D. Zhang, *Energy & Fuels*, 2022, 36, 5843-5851.
- [16] M. Nie, H. Sun, D. Lei, S. Kang, J. Liao, P. Guo, Z. Xue and F. Xue, *Materials Chemistry and Physics*, 2020, 254, 123481.
- [17] Y. Bai, Y. Li, G. Liu and J. Hu, *Journal*, 2021, 11.
- [18] B. Ren, Q. Yi, F. Yang, Y. Cheng, H. Yu, P. Han, Y. Yang, G. Chen, I. Jeerapan, Z. Li and J. Z. Ou, *Energy & Fuels*, 2022, 36, 8381-8390.
- [19] S. R. Kadam, S. Ghosh, R. Bar-Ziv and M. Bar-Sadan, *Chemistry – A European Journal*, 2020, 26, 6679-6685.
- [20] S. P. Lonkar, V. V. Pillai, S. P. Patole and S. M. Alhassan, *ACS Applied Energy Materials*, 2020, 3, 4995-5005.
- [21] G. Shao, H. Xiang, M. Huang, Y. Zong, J. Luo, Y. Feng, X.-X. Xue, J. Xu, S. Liu and Z. Zhou, *Science China Materials*, 2022, 65, 1833-1841.
- [22] Q. Zhai, H. Ji, Y. Ren, H. Wu, B. Wang, F. Li, Y. Ma and X. Meng, *International Journal of Hydrogen Energy*, 2022, 47, 21942-21951.
- [23] Y. Chen, X. Wang, M. Lao, K. Rui, X. Zheng, H. Yu, J. Ma, S. X. Dou and W.

Sun, *Nano Energy*, 2019, 64, 103918.

[24] Y. Yu, J. Xu, J. Zhang, F. Li, J. Fu, C. Li and C. An, *Journal*, 2020, 10.
